1           **First natural crossover recombination of intact ORFs**  
2                   **between two distinct species of the family**  
3                           ***Closteroviridae***

4  
5  
6   Leticia Ruiz<sup>1\*</sup>, Almudena Simón<sup>1</sup>, Carmen García<sup>1</sup>, Leonardo Velasco<sup>2</sup> and Dirk Janssen<sup>1</sup>

7  
8  
9  
10   <sup>1</sup>IFAPA Centro La Mojonera, IFAPA, La Mojonera 04745, Almería, Spain;

11   <sup>2</sup>IFAPA Centro Churriana, IFAPA, Churriana 29140, Málaga, Spain

12  
13  
14   \*Corresponding author: [mleticia.ruiz@juntadeandalucia.es](mailto:mleticia.ruiz@juntadeandalucia.es)

15

## 17 **Abstract**

18 *Lettuce chlorosis virus-SP* (LCV-SP) (family *Closteroviridae*, genus *Crinivirus*), is a  
19 new strain of LCV which is able to infect green bean plants and incapable of infecting  
20 lettuce crops. In the present study, high throughput and Sanger sequencing of RNA  
21 was used to obtain the LCV-SP full-length sequence. The LCV-SP genome comprises  
22 8825 nt and 8672 nt equivalent with RNA1 and RNA2 respectively. RNA1 of LCV-SP  
23 contains four ORFs, the proteins encoded by the ORF1a and ORF1b are closely related  
24 to LCV RNA1 from California (FJ380118) whereas the 3' end encodes proteins which  
25 share high amino acid sequence identity with RNA1 of BnYDV (EU191904). The  
26 genomic sequence of RNA2 consists of 8 ORFs, instead of 10 ORFs contained in LCV-  
27 California isolate. The distribution of vsiRNA (virus-derived small interfering RNA) along  
28 the LCV-SP genome suggested the presence of subgenomic RNAs corresponding with  
29 HSP70, P6.4 and P60. Results of the analysis using RDP4 and Simplot programs are the  
30 proof of the evidence that LCV-SP is the first recombinant of the family *Closteroviridae*  
31 by crossover recombination of intact ORFs, being the LCV RNA1 (FJ380118) and BnYDV  
32 RNA1 (EU191904) the origin of the new LCV strain. Genetic diversity values of virus  
33 isolates in the recombinant region obtained after sampling LCV-SP infected green bean  
34 between 2011 and 2017 might suggest that the recombinant virus event occurred in  
35 the area before this period. The presence of LCV-SP shows the role of recombination  
36 as a driving force of evolution within the genus *Crinivirus*, a globally distributed,  
37 emergent genus.

38

## 39 **Introduction**

40           *Lettuce chlorosis virus* (LCV) belongs to the genus *Crinivirus*, family  
41 *Closteroviridae*. Viruses included in this family are the largest among the known plant  
42 viruses and present ssRNA, positive-sense genome [1]. Family *Closteroviridae* has been  
43 classified in three genera based on vector transmission and phylogenetic relationships:  
44 *Closterovirus*, *Ampelovirus*, and *Crinivirus*. Recently, a new genus named *Velarivirus*  
45 has been proposed [2]. All members of genus *Crinivirus* include segmented genomes,  
46 are whitefly-transmitted and limited to the phloem [3].

47 Many members of genus *Crinivirus* are considered emerging epidemics worldwide [4].  
48 LCV was described in the 1990's in California, transmitted by the whitefly *Bemisia*  
49 *tabaci* and affecting lettuce and sugar beet crops [5]. The complete sequence and the  
50 genomic organization of LCV were described in 2009 by [6] and comprises a bipartite  
51 genome formed by RNA1 and RNA2. LCV RNA1 contains the replication module (ORFs  
52 1a and 1b), which encodes conserved domains of a papain-like leader proteinase (P-  
53 PRo), a methyltransferase (MTR), helicase (HEL) and RNA-dependent RNA polymerase  
54 (RdRp), ORF2 encodes a putative 8-kDa protein (P8), and ORF3 encodes a 22.9-kDa  
55 protein (P23) recently described as viral suppressor of RNA silencing [7]. LCV RNA2  
56 contains the hallmark *Closterovirus* gene array coding for a heat shock protein  
57 homolog (Hsp70h, ORF3), a 50-60 kDa protein (ORF5), the major (CP, ORF7) and the  
58 minor coat protein (CPm, ORF 8) [1,8]. Furthermore, P5.6, P6, P6.4, P9, P27, and P4.8  
59 are encoded by ORF1, ORF2, ORF4, ORF6, ORF9 and ORF10, respectively; the functions  
60 of these putative proteins remain unknown [6].

61           LCV share high homology with *Cucurbit chlorotic yellow virus* (CCYV) and with  
62 *Bean yellow disorder virus* (BnYDV), [9,6], this last one, was recognized as the first

63 *Crinivirus* that infects Leguminosae family crops [10]. LCV was considered as an  
64 endemic infection which had not spread to areas outside Southwestern USA [4]. In  
65 2014 however, symptoms similar to BnYDV in green bean crops were attributed to a  
66 new strain of LCV, LCV-SP, which was unable to infect lettuce plants and capable of  
67 affecting green bean crops [11].

68         Viral RNA-RNA recombination and/or reassortment of genomic segments  
69 (pseudo-recombination), between virus strains or virus species, increase the genetic  
70 variability and is a powerful tool in virus evolution, responsible for the emergence of  
71 new viral strains or species [12]. RNA recombination can also be used to repair viral  
72 genomes which will contribute to the fitness of viral populations. The low frequency of  
73 its detection is probably the result of selection pressure that removes the majority of  
74 recombinants [13]. The first evidence of genetic recombination was described in  
75 *Bromo mosaic virus* [14] and it seems to be specially frequent among species belonging  
76 to the family *Potyviridae* where crossovers have been described at ORFs and 3'UTR  
77 sequences [15-17,13].

78         Within family *Closteroviridae* homologous recombination has been described at  
79 CP and P20 in the *Closterovirus* member *Citrus tristeza virus* (CTV) [18,19] and at CP of  
80 the *Ampeloviruses* Grapevine leafroll-associated virus 3 (GLRaV-3) and GLRaV-11  
81 [19,20]. Although *Closterovirus* members share a core of conserved genes, they  
82 present high variability in the set of ORFs located in the 3'end of RNA or in the 3'end of  
83 RNA 1 if the genome is bipartite, as is the case of genus *Crinivirus* [1,21]. The presence  
84 of mechanisms capable of increasing genetic variability such as genome recombination

85 may have important evolutionary implications because some of these proteins have  
86 been characterized as RNA-suppressing proteins (RSS)[22-25,7].

87 In this study we describe a recombinant *Crinivirus*, LCV-SP, originating from a crossover  
88 of intact ORFs and analyse a population of isolates collected in the area. Sequencing  
89 was achieved by combining primer walking strategy and high-throughput sequencing.  
90 The implications in emergence of *Crinivirus* epidemiology are discussed.

91

## 92 **Material and methods**

### 93 **Virus isolate**

94

95 Between 2011 and 2017 samples of green bean leaves showing symptoms that  
96 could be attributed to LCV-SP (interveinal mottling and yellowing in lower and middle  
97 leaves [11]) were collected from different geographical locations from Granada,  
98 Almeria and Málaga provinces in Southeastern Spain. The plants were analysed by RT-  
99 PCR to ensure the presence of LCV-SP [11] and stored at -80°C for subsequent  
100 molecular analysis. One of these isolates collected in 2013 and annotated as "Almeria"  
101 was used for complete genome determination.

### 102 **Whole-genome sequencing of LCV-SP and genome analysis**

103 Total RNA from LCV-SP isolate "Almeria" was extracted with Trizol Reagent  
104 (Invitrogen) according to the manufacturer's instructions. Partial length viral sequence  
105 of RNA1 and RNA2 of LCV genome was determined by RT-PCR using a primer walking  
106 strategy with a set of degenerated primers based on LCV (FJ380118, FJ380119) and  
107 BnYDV (NC010560, NC010561) sequences (data not shown). Partial sequences of LCV-

108 SP RNA1 and RNA2 previously described [11] were also used to design specific primers  
109 and flank the gaps. The sequences were assembled using the software GENEIOUS (v.  
110 7.1.9, Biomatters, New Zealand).

## 111 **Small RNA purification, dsRNA extraction and deep sequencing**

112 Small RNA purification from the Almeria LCV-SP isolate was obtained using the  
113 miRCURY RNA isolation kit (Exiqon, Denmark), according to the manufacturer's  
114 instructions. Small RNA library was prepared using the Illumina TruSeq Small RNA Kit  
115 (Illumina, San Diego, California, USA). The library was sequenced on the Illumina deep  
116 sequencing platform using the services provided by CRG (Barcelona, Spain).  
117 Sequencing adapters and reads shorter than 18 nucleotides (nt) were removed using  
118 GENEIOUS and reads ranging from 18 to 24 nt were selected. These reads were  
119 assembled into contigs larger than 33 nt using the *de novo* assembly function of  
120 VELVET v. 1.2.08 implemented in the SCBI Picasso server (<http://www.scbi.uma.es>)  
121 with a k-mer = 18. Partial RNA1 and RNA2 LCV-SP sequence obtained for Sanger  
122 sequencing was used as a reference for contigs sequences. RNA1 and RNA2 consensus  
123 draft sequences obtained were ensured through RT-PCR amplification using specific  
124 primer pair based on the assembled genomes (not shown). The 5'/3' Smart™ RACE  
125 cDNA Amplification Kit (Clontech, California, USA) was used to complete the 5' and  
126 3'ends. PCR fragments were cloned in pGemT vector and at least two cDNA clones  
127 were sequenced in both directions. To obtain the profile distribution of LCV-SP virus-  
128 derived small interfering RNAs (vsRNAs), the 21 and 22 nt reads of the small RNA  
129 library were aligned to the assembled LCV-SP genome using MISIS-2 [26].

## 130 **Double stranded RNA purification**

131 Deep sequence from LCV-SP dsRNA was used to confirm the LCV-SP RNA1 and  
132 RNA2 genomic sequences. For that, double-stranded RNA was purified from another  
133 LCV-SP isolate collected in 2014 [27] followed by S1 nuclease (Promega, Madison,  
134 Wisconsin, USA) and DNAase I (Invitrogen, Carlsbad, California, USA) treatments to  
135 discard the contamination with genomic DNA and ssRNAs. A library was constructed  
136 and sequenced using the Illumina deep sequencing platform with the services provided  
137 by CRG (Barcelona, Spain). Contigs were assembled after trimming the low-quality  
138 reads by using VELVET (k-mer = 31). Complete sequence of LCV-SP obtained as above is  
139 described was used as reference for contigs aligning in GENEIOUS v. 7.1.9.

140 The contigs obtained from both massive deep sequencing were conducted to  
141 BLAST analysis against the GenBank database in NCBI (<http://www.ncbi.nlm.nih.gov>)  
142 using GENEIOUS. The e-value cut-off was set to  $10^{-5}$  so high confidence matches could  
143 be reported. The numbers of reads aligning to LCV or BnYDV genomes were annotated  
144 to confirm the presence of sequences belonging to both virus species.

145

## 146 **Phylogenetic analysis**

147 For phylogenetic analysis, the complete genome sequences from 9 members of  
148 genus *Crinivirus*, retrieved from the GenBank database and the complete sequence of  
149 LCV-SP were compared. The pairwise percentage of nucleotide sequence identity was  
150 performed using the Clustal W algorithm present in MEGA v 7.01 program [28].  
151 Appropriate nucleotide substitution models for each genomic region were determined  
152 using jModelTest 2.1 [29] and the best model proposed by the Akaike information  
153 criterion (AIC) applied in each cases (GTR+I+G for RNA1 and HSP70h; JC for RNA2,  
154 GTR+G for CP, CPm and RdRp). Bayesian consensus phylogenetic trees were inferred

155 using Bayesian inference and Markov chain Monte Carlo (MCMC) simulation  
156 implemented in MrBayes plugin. MCMC analyses were run with a chain length of  $10^7$   
157 generations, sampling every 1000 trees and with a burn-in of 25% and chain heated to  
158 0.2.

## 159 **Recombination analysis**

160 Recombination Detection Program 4 (RDP4) was used to detect potential  
161 recombination events in LCV-SP, likely parental sequences, and localization of  
162 recombination breakpoints [30]. The program was executed with default parameter  
163 settings which include the RDP, GENECONV, Chimaera, MaxChi, BOOTSCAN, and  
164 SISCAN methods. For recombination analysis, sequences of RNA1 and RNA2 of LCV,  
165 BnYDV, LCV-SP and CCYV were aligned in MEGA v.7.0.1 software [28] and exported to  
166 the RDP4 program for recombination analysis. The program was performed using the  
167 default settings and a Bonferroni corrected  $p$ -value cut-off ( $\alpha=0.05$ ). Only  
168 recombination events detected by four or more methods were considered as  
169 significant. The results obtained by RDP were confirmed using a boot scanning method  
170 in the SimPlot program v.3.5.1 [31].

## 171 **Genetic diversity in the recombinant genomic region**

172 The crossover recombination event was confirmed in several isolates by RT-  
173 PCR. Eleven isolates obtained in the surveys from 2011 to 2017 were analysed by RT-  
174 PCR after RNA extraction using the primers LCVSP-44F  
175 5'GCATTCAAGAAATTGTGGGATG 3' (nt 7517-7538) and LCVSP-50R  
176 5'ATATTAATGTAATTCTACGGTC 3' (nt 8738-8759) which amplified a region of the LCV-



177 SP genome encompassing 1242 bp corresponding to the entire region of the p26 and  
178 p6 proteins. Reverse transcription of the isolates was carried out with a reverse primer  
179 using Superscript II (Invitrogen) at 42°C for 60 min. Subsequently, DNA fragments were  
180 amplified by PCR with Expand High Fidelity PCR System (Roche, Basel, Switzerland)  
181 under the following conditions: 95°C for 3 min, 35 cycles of denaturation for 20s at  
182 95°C, annealing for 30s at 55°C and extension for 40s at 72°C followed by one final  
183 extension cycle for 5 min at 72°C. PCR products were cloned into pGemT-Easy vector  
184 (Promega Corporation, Madison, USA). The clones were bidirectionally sequenced.  
185 Nucleotide alignments were performed using Clustal W in MEGA v. 7.01 [28] software  
186 with default settings. The aligned sequences were used to calculate the genetic  
187 distances for synonymous (dS) and non-synonymous substitution (dNS) as described by  
188 [32,33] (PBL method).

## 189 **Molecular differentiation between yellowing induced by BnYDV** 190 **or LCV recombinant virus (LCV-SP)**

191 In order to determine analytically the presence of the recombinant *Crinivirus*  
192 LCV-SP, a RT-PCR-restriction fragment length polymorphism (RFLP) was performed.  
193 The set of primers LC-Bn56F 5'GATTTTGGATTTGAAGC 3' and LC-Bn51R  
194 5'ACAACAGATCAAAATCCACAATG 3' which amplified fragments of LCV-SP RNA1 and  
195 BnYDV RNA1 genome of 739 and 769 bp, corresponding to nucleotides 7190–7928 and  
196 7294-8062 respectively were used for a RT-PCR reaction as described above. After  
197 that, the PCR products were digested with *KpnI* (Promega) following the  
198 manufacturer's instructions. Band patterns were analysed on a 2% agarose gel.

## 199 Results

### 200 Genome sequencing of LCV-SP

201 Walking strategy and Sanger sequencing allowed us to obtain 7109 bp and 7821  
202 bp corresponding to 80% and 90% of complete genome of RNA1 and RNA2 of LCV-SP.  
203 The LCV-SP genome was completed by deep sequencing from small RNAs and RACE  
204 strategy. The genome was confirmed through RT-PCR amplification with specific  
205 primers (S1 Table) and consisting of 8825 nt and 8672 nt equivalent with RNA1 and  
206 RNA2 of GenBank accession numbers MG489894 and MG489895, respectively. Genetic  
207 organization of LCV-SP genome is shown in Fig 1. RNA1 of LCV-SP contains four ORFs:  
208 ORF1a (nt 73-7561) and ORF1b (nt 6044-7561) contains the replication module and the  
209 P-PRO, MTR and RdRp motifs. ORF2 (nt 7637-8338) encodes a predicted protein of 26-  
210 kDa (P26) and it is followed by another putative protein of 6-kDa (P6) (ORF3, nt 8339-  
211 8512). The proteins encoded by ORF1a and ORF1b share a 93.6 % and 99.6%  
212 respectively of amino acid sequence identity with LCV RNA1 from California  
213 (FJ380118). Whereas the 5' from LCV-SP RNA1 are closely related to the LCV RNA1  
214 genome previously described; the 3' end encodes proteins corresponding to the RNA1  
215 of BnYDV (EU191904). The P26 (ORF2) and P6 (ORF3) share a 99.5% and 100% amino  
216 acid sequence identity with those present in BnYDV. Both proteins currently have an  
217 unknown function; P26 has no homologues in the GenBank database and P6 display  
218 only 30% of amino acid sequence identity with a P6a protein of a new unclassified  
219 *Crinivirus* named *Tetterwort vein chlorosis virus* (ALE18214). The genomic sequence of  
220 RNA2 consists of 8 ORFs, instead of the 10 ORFs contained in LCV-California isolate [6].

221 The genomic sequence comprises the hallmark gene array of the family *Closteroviridae*  
222 coding for a HSP70h (ORF5, nt 1817-3483), and three diverged copies of the capsid  
223 protein: the ortholog of the coat protein homolog (ORF4, nt 3642–5195), the CP (ORF6,  
224 nt 5537–6289) and the CPm (ORF7, nt 6289-7713) which exhibit more than 95% amino  
225 acid sequence identity with RNA2 of LCV FJ380119. RNA2 of LCV-SP encodes also three  
226 putative small proteins: P5.6 (ORF1, nt 254-421), P6.4 (ORF3, nt 3484-3648) and P9  
227 (ORF5, nt 5177-5416), which show 92%, 98% and 96% nucleic acid identity with those  
228 in LCV FJ380119. Two putative small proteins in the RNA2 of LCV-Californian isolate  
229 (FJ380119), P6 in the 5' end, and P4.8 in the 3' end, which have unknown function are  
230 absent in LCV-SP. The last ORF of RNA2 (ORF9) encodes a putative P27, which shows a  
231 high amino acid identity (98%) with its counterpart protein in LCV FJ380119.

232 **Fig 1. Diagram of genome organization of LCV-SP genome.** Boxes represent ORFs;  
233 putative protein products are also indicated. Solid lines represent the location of  
234 contigs assembled from virus-derived small RNAs of LCV-SP.

### 235 **5' and 3' non coding region**

236 The putative 5'UTR of LCV-SP RNA1 and RNA2 are 72 and 269 nt in length, and  
237 share 99% and 96% of nucleotide identity with LCV FJ380118/FJ380119 respectively.  
238 The first 5 nucleotides, GAAAT, are identical in both RNAs. This feature has been  
239 described in the Californian LCV isolate and in other members of genus *Crinivirus* [6].  
240 Table 1 shows the percentage of nucleotide identity among 3'UTR regions  
241 corresponding with LCV-SP (RNA1 and 2), BnYDV (RNA1 and 2) and the Californian  
242 isolate of LCV (RNA 1 and 2). The 3'UTR of RNAs 1 and 2 are 313 and 256 nt in length

243 respectively and shared high nucleotide sequence similarity (72%). Also, 3'UTR of  
244 RNA1 displays almost identical nucleotide sequence (99%) as its equivalent in BnYDV.  
245 This sequence is next to the putative proteins P26 and P6 corresponding to the 3'end  
246 of RNA1 of BnYDV and LCV-SP. Additionally, 3'UTR of RNA2 of LCV-SP show the highest  
247 homology (89%) with the 3'UTR of RNA1 of the Californian isolate of LCV FJ380118.

248 **Table 1. Percentage of nucleotide identity between 3'UTRs region of LCV-SP, LCV and**  
249 **BnYDV.**

|             | LCV-SP RNA1 | BnYDV RNA1 | LCV RNA1 | LCV-SP RNA2 | LCV RNA2 | BnYDV RNA2 |
|-------------|-------------|------------|----------|-------------|----------|------------|
| LCV-SP RNA1 |             | 99.7       | 70.1     | 71.4        | 72.2     | 56.2       |
| BnYDV RNA1  | 99.7        |            | 69.8     | 71.4        | 71.4     | 57.0       |
| LCV RNA1    | 70.1        | 69.8       |          | 89.5        | 79.8     | 57.8       |
| LCV-SP RNA2 | 71.4        | 71.4       | 89.5     |             | 79.6     | 61.3       |
| LCV RNA2    | 72.2        | 71.4       | 79.8     | 79.6        |          | 52.8       |
| BnYDV RNA2  | 56.2        | 57.0       | 57.8     | 61.3        | 52.8     |            |

250 LCV RNA1: FJ380118; LCV RNA2: FJ380119; BnYDV RNA1: EU191904; BnYDV RNA2: EU191905; LCV-SP-

251 RNA1 : MG489894; LCV-SP RNA2: MG489895

252

## 253 Libraries of small RNAs and dsRNAs

254 After removal of adapters and reads shorter than 18, deep sequencing from  
255 small RNAs library produced a set of 44,578 million reads, which were subjected to the  
256 novo assembled, generating 19,739 contigs. A total of 113 and 125 sequences of these  
257 contigs assembled with LCV-SP RNA1 and RNA2, respectively. Fig 1 shows the location  
258 of the contigs derived from small RNA reads and assembled to the LCV-SP RNA1 and  
259 RNA2 genome components. The recombinant genome of LCV-SP was confirmed also  
260 by deep sequencing library obtained from dsRNA extracted from a LCV-SP green bean-  
261 infected plant that resulted in 31,353,455 reads. These sequences were assembled

262 resulting in 3642 contigs. These contigs covered 90% of the LCV-SP RNA1 genome and  
263 the consensus sequence result was 100% identical. Contigs assembled with LCV-SP  
264 RNA2 covered 94% of LCV-SP RNA2 genome with 99.7% coincidence.

265 The result of BLASTN is shown in S2 Table. Only sequences matching the RNA1  
266 and RNA2 of different LCV isolates and the 3' end of the RNA1 of BnYDV (EU191904),  
267 corresponding to P26 and the 3'UTR, were identified. All the sequences identified in  
268 BLASTN as part of the genome of RNA1 of LCV showed high nucleotide identity (more  
269 than 80%) with ORFs 1a and 1b. No sequences corresponding to the 3' end of RNA1 of  
270 LCV were identified, confirming the presence of the first *Crinivirus* arising by crossover  
271 recombination of entire ORFs and discarding the presence of a native LCV in the plants.  
272 The profiles of vsiRNAs aligned to LCV-SP RNA1 and 2 were analysed. The 21-nt vsiRNA  
273 class population was most prevalent, followed by the 22-nt (10.1 and 2.6 million  
274 respectively.) From this 21-nt population, 58 675 and 80 904 reads matched to LCV-SP  
275 RNA1 and 2 genome. In the case of 22-nt class population, 53.932 and 68.146 matched  
276 with LCV-SP RNA1 and 2. The analysis of 21 and 22-nt (not shown) vsiRNA strand  
277 polarity showed similar pictures, 53% of 21 and 22-nt vsiRNA class populations aligned  
278 to LCV-SP RNA1 were negative, whereas more than 50% of 21-nt and 22-nt vsiRNA  
279 class populations aligning to LCV-SP RNA2 were positive (53% and 51%, respectively).  
280 The profile distribution of both vsiRNAs populations aligning to the LCV-SP RNA1 and  
281 RNA2 genome components were also very similar. The distribution of 21-nt vsiRNAs  
282 along LCV-SP RNA1 and 2 genome is shown in the Fig 2. Several vsiRNA-generating  
283 regions (named as hot spots) were identified in both genomic RNAs of LCV-SP. Hot  
284 spots in RNA1 were located between MTR and HEL domains. The distribution of vsiRNA

285 hotspots in the RNA2 genome corresponding with ORF 2 (HSP70), 3 (P6.4) and 4 (P60)  
286 are correlated with the position of subgenomic RNAs in LCV described by [6]. A hotspot  
287 located in the position 1361 of RNA2 does not correspond with any putative coding  
288 region.

289 **Fig 2. Profiles distribution of 21-nt vsRNAs along LCV-SP RNA1 (A) and RNA2 (B).**  
290 Sense and antisense of 21-nt vsRNAs orientations are above and below the axis  
291 respectively. Schema of LCV-SP RNA1 and RNA2, genome is represented as reference.

292 Investigating the 5'- and 3'-terminal nucleotides of the vsRNAs provides insight  
293 into the specific silencing machinery active in the plant. In S1 Fig we represent the  
294 percentages of nucleotides at each terminal position for the 21 to 24-nt vsRNA  
295 populations matching LCV-SP RNA1 and RNA2. For both RNAs, there is a bias towards  
296 A/U in the 5' and 3' nucleotide positions in the 21 to 24-nt classes of vsRNAs.

## 297 **Phylogenetic analysis**

298 The phylogenetic trees generated with the complete sequence of RNA1 and  
299 RNA2 of LCV-SP and other members of genus *Crinivirus* show two well differentiated  
300 lineages; one comprising LCV-SP, LCV, CCYV, BnYDV and CYSDV and the other is formed  
301 by BPYV, ToCV, PVYV and LIYV (Fig 3) Then, two clades were generated where the  
302 divergence is clear.

303 **Fig 3. Bayesian phylogenetic trees of RNA1 and RNA2 full-length of selected viruses**  
304 **from the genus *Crinivirus*.** *Citrus tristeza virus* (CTV, NC001661), was used as an  
305 outgroup. *Lettuce chlorosis virus* (LCV, FJ380118, FJ380119), *Lettuce chlorosis virus-SP*  
306 (LCV-SP, MG489894, MG489895), *Lettuce infectious yellows virus* (LIYV, NC003617,  
307 NC003618), *Cucurbit yellow disorder virus* (CYSDV, NC004809, NC004810), *Cucurbit*

308 *chlorotic yellow virus* (CCYV, JQ904628, JQ904629), *Bean yellow disorder virus* (BnYDV),  
309 *Beet pseudo yellows virus* (BPYV, AY330918, AY330919), *Tomato chlorosis virus* (ToCV,  
310 KP137100, KP137101), *Potato yellow vein virus* (PYVV, NC006062). PYVV genome is  
311 tripartite and only its RNA1 has been considered in this analysis. Posterior probability  
312 is indicated.

313 Identical typology is observed when the Bayesian analysis is done for the RdRp  
314 region (Fig 4). When the analysis is done for other genomic relevant regions for  
315 *Crinivirus* species demarcation as CP and CPm, two clades are also generated where  
316 LCV-SP group with LCV, CCYV, BnYDV and CYSDV. Although in the same genetic clade,  
317 CYSDV is particularly distant from LCV-SP, LCV, CCYV and BnYDV. The topology  
318 generated in the phylogenetical analysis carried out for the HSP70 region was slightly  
319 different from the CP gene tree because LCV-SP was located nearer BnYDV than CCYV  
320 (Fig 4). This may indicate distinct recombination events in the *Crinivirus* genus. All the  
321 phylogenetic trees presented in this work show that, independently of the gene  
322 analysed, BnYDV and CCYV are closely related to LCV-SP and LCV although LCV, LCV-SP  
323 and CCYV, have different host ranges and also have not been described in the same  
324 geographic area.

325 **Fig 4. Bayesian phylogenetic trees for genomic relevant regions for *Crinivirus* genus**  
326 **demarcation as HSP70, RdRp, CP and CPm.** Accession numbers and virus acronyms are  
327 as in Fig 3. NC006063 and NC006061 corresponding with RNA2 and RNA3 of PYVV  
328 were added for HSP70, CP and CPm analysis.

329

## 330 **Recombination analysis and variability in the recombinant** 331 **genomic region**

332 RDP4 package program was used to further confirm the putative existence of  
333 first recombinant *Crinivirus* detected by Sanger and deep sequencing. Genomic  
334 sequence of RNA1 and RNA 2 belonging to LCV, BnYDV, CCYV and LCV-SP aligned were  
335 scanned in RDP4 using multiple methods. The full recombination scan of both RNA  
336 genomes (1 and 2) of LCV, BnYDV, CCYV and LCV-SP resulted in four recombination  
337 events detected (Figure 5, Table 2). The analysis detected LCV RNA1 and BnYDV RNA1  
338 as possible major and minor parental sequences for LCV-SP RNA1 (event 1) with a 99%  
339 level of confidence (Table 2, event 1). This event was identified by all seven methods  
340 implemented in this package and, all of them show higher  $p$  value than any other  
341 algorithm executed in the rest of the events detected. BnYDV RNA1 was also suggested  
342 as a major parental sequence for CCYV RNA1 using five algorithms and with unknown  
343 minor parental (Table 2, event 2). Event 3 was detected by seven algorithms and  
344 signaled to LCV RNA2 as minor parental and CCYV-RNA2 as a possible recombinant.  
345 Although this event was suggested for seven methods as event number 1 was, the  
346 highest  $p$ -value ( $7,181 \times 10^{-9}$ , RDP) is much lower than in event 1 ( $5,710 \times 10^{-103}$ , RDP).  
347 LCV RNA2 was identified for six methods as a putative recombinant in event 4 with  
348 LCV-SP RNA2 and CCYV RNA2 as major and minor possible parental respectively (Table  
349 2, event 4).

350 **Fig 5. Recombination analysis of RNA1 and RNA2 of LCV, BnYDV, LCV-SP and CCYV**  
351 **using the recombination detection program (RDP-4).**



352

353 **Table 2. Unique recombination events identified by Recombination Detection Program v 4.80 (RDP4).**

354

| Event | Recombinant | Major parent | Minor parent | RDP                      | Geneconv                | Bootscan                 | Maxchi                  | Chimaera                | Siscan                  | 3Seq                    | Begin | End  |
|-------|-------------|--------------|--------------|--------------------------|-------------------------|--------------------------|-------------------------|-------------------------|-------------------------|-------------------------|-------|------|
| 1     | LCV-SP RNA1 | LCV RNA1     | BnYDV RNA1   | $5,710 \times 10^{-103}$ | $6,418 \times 10^{-63}$ | $2,665 \times 10^{-107}$ | $5,521 \times 10^{-29}$ | $4,462 \times 10^{-28}$ | $2,232 \times 10^{-36}$ | $1,332 \times 10^{-15}$ | 7580  | 8815 |
| 2     | CCYV RNA1   | BnYDV RNA1   | Unknown      | $2,182 \times 10^{-4}$   |                         |                          | $1,403 \times 10^{-2}$  | $6,949 \times 10^{-4}$  | $3,625 \times 10^{-5}$  | $2,131 \times 10^{-2}$  | 7044  | 8225 |
| 3     | CCYV RNA2   | Unknown      | LCV RNA2     | $1,498 \times 10^{-9}$   | $1,498 \times 10^{-4}$  | $3,316 \times 10^{-9}$   | $2,801 \times 10^{-2}$  | $4,708 \times 10^{-4}$  | $6,834 \times 10^{-6}$  | $7,181 \times 10^{-9}$  | 7858  | 75   |
| 4     | LCV RNA2    | LCV-SP RNA2  | CCYV RNA2    | $6,581 \times 10^{-6}$   | $2,614 \times 10^{-2}$  | $6,247 \times 10^{-3}$   | $5,859 \times 10^{-9}$  | $5,244 \times 10^{-6}$  |                         | $1,109 \times 10^{-4}$  | 585   | 1046 |

355

356

357

358

359

360 To confirm the result obtained from RDP4, BootScan analysis using each  
361 putative recombinant as query sequence were executed with the Simplot package.  
362 When the analysis was performed for LCV-SP RNA1, a point of recombination was  
363 detected in the same genomic area described by RDP4 (Fig 6). This result supports the  
364 evidence that LCV RNA1 (FJ380118) and BnYDV RNA1 (EU191904) are the origin of the  
365 LCV-SP RNA1 genome. The recombination events 2 and 4 however, were not  
366 recognized by the Simplot package. Bootscan analysis using CCYV RNA2 as query (Fig 7)  
367 suggested a recombination point at 3'UTR as is described in RDP4 (Fig 5) but not in the  
368 5'UTR region (Fig 6).

369 **Fig 6. Bootscan analysis with Simplot program using LCV-SP RNA1 as the query**  
370 **sequence.** CCYV, LCV, and BnYDV RNA1 were compared. Analysis was carried out with  
371 a sliding window of 200 bp and a step size of 20 bp.

372 **Fig 7. Bootscan analysis with Simplot program using CCYV RNA2 as the query**  
373 **sequence.** CCYV, LCV, and BnYDV RNA2 were compared. Analysis was carried out with  
374 a sliding window of 200 bp and a step size of 20 bp.

375 Eleven DNA fragments corresponding with the entire P26 and P6 sequence of  
376 the RNA1 of LCV-SP were submitted to the GenBank database with the accession  
377 numbers assigned (MH170031-MH170041). These sequences confirmed the presence  
378 of the recombinant LCV-SP in the south of Spain since at least 2011. Values of genetic  
379 distance sequences at non-synonymous positions for both ORFs were of the same  
380 magnitude (Table 3). The ratio between nucleotide diversity values in non-synonymous  
381 and synonymous positions (dNS/dS ratio) indicates the amount of variation in the

382 nucleic acid which results in variation in the encoded protein [34-36]. For P26, genetic  
383 distance at synonymous positions was null, and consequently, it was not possible to  
384 calculate the dNS/dS ratio. In the case of P6, The dNS/dS ratio was below unity, which  
385 could indicate a negative selection against protein change. However, the value of the  
386 standard error is too high to consider the data conclusively.

387 **Table 3. Nucleotide diversity for the 3' end LCVSP genome**

| Sequence | dNS     | SE      | dS      | SE      | D       | SE      |
|----------|---------|---------|---------|---------|---------|---------|
| p26      | 0.00126 | 0.00087 | 0       | 0       | 0.0009  | 0.00072 |
| p6       | 0.00167 | 0.00166 | 0.00305 | 0.00321 | 0.00212 | 0.00153 |

388 Nucleotide diversities computed for nonsynonymous (dNS) and synonymous (dS) positions using the  
389 PBL method (see Methods). Standard errors (SE) were calculated by bootstrap method with 500  
390 replicates.

## 391 **Molecular differentiation between yellowing induced by BnYDV** 392 **or LCV-SP**

393 Restriction analysis with *KpnI* after RT-PCR with the primers LC-BnF/LC-BnL ,  
394 which amplified partial sequence of RdRp and P26 in both viruses, yielded two  
395 fragments of 582 y 157 bp when the virus was LCV-SP and a single band of 769 bp  
396 when the virus present was BnYDV. This RFLP test is then capable of distinguishing  
397 yellowing disease originating from recombinant or non-recombinant virus isolates (Fig  
398 8).

399 **Fig 8. RFLP analysis with *KpnI* after RT-PCR with by primers LC-BnF/LC-BnL.** Lanes 1, 3:  
400 cut amplification products of LCV-SP isolates obtained in 2013 and 2017 respectively.  
401 Lanes 2 and 4: same amplification products uncut. Lane 5 and 7: cut amplification

402 product of BnYDV isolates obtained in 2005 and 2009. Lanes 6 and 8: same  
403 amplification products uncut.

## 404 Discussion

405 Members of genus *Crinivirus* represent a worldwide emerging disease as  
406 evidence of the increasing number of new species identified during the past 20 years  
407 [37-39, 9, 4]. Or, as in another example, a species already described increases its host  
408 range [40]. New LCV isolates have been recently described affecting ornamental  
409 plants, tobacco and tomato crops [41-43]; but there is no information about the  
410 capability of these LCV isolates to infect lettuce crops. Primer walking method and  
411 deep sequencing of vsRNA allowed the elucidation of the sequence and genome  
412 organization of the first recombinant closterovirus resulting after crossover  
413 recombination of intact ORFs. The 5' from LCV-SP RNA1 includes the replication  
414 module (ORF 1a and 1b), which share high homology (more than 90%) with the LCV  
415 type isolate (FJ380118); however, the 3' end, which encompass P26 and P6, shares high  
416 amino acid identity with the 3' end of BnYDV RNA1 (99 and 100%, respectively). These  
417 ORFs, are described to be expressed in LCV from 3' coterminal subgenomic RNAs  
418 (sgRNAs), a typical strategy among closteroviruses [8,6,44] that increases the  
419 probability of recombination events [45].

420 The genomic sequence of LCV-SP RNA2 share 8 ORFs with the Californian  
421 isolate of LCV (FJ380119); P6, and P4.8, located in the 5' and 3' end of the Californian  
422 isolate, respectively, and with unknown function, are absent in LCV-SP. Both putative

423 proteins are also absent in the LCV Chinese isolates recently reported [41,42], which  
424 could indicate that these genes are not essential in the biology of LCV.

425 3'UTRs sequences in both genomic RNAs are highly conserved, sharing 72% of  
426 nucleotide sequence identity. This feature is common among criniviruses [46] and it  
427 agrees with the notion that sequence identity is essential to generate structures that  
428 facilitate the synthesis of the negative sense RNA during replication [47,48,44].

429 The accumulation of vsiRNAs observed in different genome regions probably  
430 involve gene expression strategies common within closteroviruses as translational  
431 frameshift and the production of 3'coterminial sgRNAs [8]. The lower presence of  
432 vsiRNAs along ORF 1b, compared with ORF 1a, suggest that this ORF is presumably  
433 expressed by translation via a +1 ribosomal frameshift rather than by sgRNA  
434 production as it was proposed before for LCV and other closteroviruses [49-51,6]. The  
435 presence of vsiRNAs hot spots along ORF 2, 3 and 4 of LCV-SP RNA2, could correspond  
436 with the production of sgRNAs, as was described in LCV [6].

437 Higher number of 21-nt class vsiRNAs populations with respect to 22-nt support  
438 the prevalence of a Dicer like protein 4 (DCL4) in the production of vsiRNAs in beans, as  
439 has been suggested in others plants [52,53]. 21- and 22-nt vsiRNAs populations,  
440 showed the same preference for sense or antisense polarity in RNA1 and RNA2,  
441 indicating that the mechanisms responsible for strand polarity are not dependent on  
442 the preference of DCL enzymes but on other factors specific to this virus species. The  
443 nucleotides present at the 5' and 3' terminal positions were investigated and resulted  
444 in an overall preference for A/U nucleotides. This prevalence is widespread among  
445 plant virus-pathosystems [54] and indicates the involvement of similar AGO complexes

446 in the silencing of LCV-SP by green beans. Although the function of P26 and P6 in LCV-  
447 SP RNA1 (and hence BnYDV-RNA1) is unknown, the reduction of vsiRNA populations in  
448 this region could suggest that P26 or P6 interfered with the accumulation of vsiRNA.  
449 Recently, P23 of LCV, the closest homologous protein of P26, and also located at the  
450 3' end of RNA1, has been described as a viral suppressor of RNA silencing (VSRs) and  
451 whose suppressor activity produces a reduction of siRNA [7]. To elucidate this  
452 hypothesis additional experiments are required.

453 Phylogenetic analysis grouped LCV-SP closely in the same lineage as LCV, CCYV and  
454 BnYDV as was already reported [9,6]. Recombination analysis completed with RDP4  
455 and Simplot programs, demonstrates the existence of natural crossover recombination  
456 of intact ORFs between LCV-RNA1 and BnYDV-RNA1 (event 1). The recombinant virus,  
457 LCV-SP, shifted its host range by affecting green bean crops and not lettuce, its original  
458 host [11,5]. No other evident recombination events were detected in our analyses.  
459 Events 2, 3 and 4 have been discarded as possible recombinants although, alternatively  
460 they could be indicative of the close genetic relationship between LCV, LCV-SP, BnYDV  
461 and CCYV, as has been observed in the phylogenetic analysis. Plant virus with  
462 segmented genomes seem to frequently accumulate recombinants [45,55]. Within  
463 genus *Crinivirus*, which shows the lowest variability within the family *Closteroviridae*  
464 [19], only *Sweet potato chlorotic stunt virus* (SPCV) and *Beet pseudo yellows virus*  
465 (BPYV) have been reported as examples of recombination-mediated gene gain [39,21].  
466 The existence of LCV-SP changes the perspectives of the possible epidemiological  
467 scenarios within the genus *Crinivirus*, an emergent genus and, as we have  
468 demonstrated, with more recombination possibilities than previously shown.

469

## 470 **Acknowledgments**

471 The authors want to thank to Antonia Belmonte for her excellent technical assistance  
472 and Vince Reid for his help in the grammatical revision of the manuscript.

## 473 **Author Contributions**

474 Conceived and designed the experiments: LR, DJ. Performed the experiments: LR, AS,  
475 CG, LV Analyzed the data: LR, LV, DJ. Wrote the paper: LR, DJ.

## 477 REFERENCES

- 478 1. Dolja VV, Kreuze JF, Valkonen JP. Comparative and functional genomics of  
479 closteroviruses. *Virus Res.* 2006; 117 (1):38–51.
- 480 2. Al Rwahnih M, Dolja VV, Daubert S, Koonin EV, and Rowhani A.. Genomic and  
481 bio-logical analysis of Grapevine leafroll-associated virus 7 reveals a possible  
482 new genus within the family Closteroviridae. *Virus Res.* 2012; 163:302–309.  
483 doi:10.1016/j.virusres.2011.10.018
- 484 3. Martelli GP, Agranovsky AA, Bar-Joseph M, Boscia D, Candresse T, Coutts RHA,  
485 et al. Family Closteroviridae. In: 33 *Virus Taxonomy: Ninth Report of the*  
486 *International Committee on Taxonomy of 34 Viruses.* A. King, M. J. Adams, E. B.  
487 Carstens, and E. J. Lefkowitz, eds. Elsevier-35 Academic Press, Amsterdam, The  
488 Netherlands; 2012. pp. 987-1001.
- 489 4. Tzanetakis IE, Martin RR, Wintermantel WM. Epidemiology of criniviruses: An  
490 emerging problem in world agriculture. *Front Microbiol.* 2013; 4(MAY): 1–15.  
491 doi: 10.3389/fmicb.2013.00119.
- 492 5. Duffus JE, Liu HY, Wisler GC, Li R. Lettuce chlorosis virus a new whitefly-  
493 transmitted closterovirus. *Eur. J. Plant Pathol.* 1996; 102:591-596.
- 494 6. Salem NM, Chen AYS, Tzanetakis IE, Mongkolsiriwattana C, Ng JCK. Further  
495 complexity of the genus Crinivirus revealed by the complete genome sequence  
496 of Lettuce chlorosis virus (LCV) and the similar temporal accumulation of LCV  
497 genomic RNAs 1 and 2. *Virology.* 2009; 390(1):45–55. doi:  
498 10.1016/j.virol.2009.04.025



- 499 7. Kubota K, Ng JCK. Lettuce chlorosis virus P23 Suppresses RNA Silencing and  
500 Induces Local Necrosis with Increased Severity at Raised Temperatures.  
501 Phytopathology. 2016; 106 (6):653–662. doi: 10.1094/PHYTO-09-15-0219-R
- 502 8. Karasev AV. Genetic diversity and evolution of closteroviruses. Annu Rev  
503 Phytopathol. 2000; 38:293–324.
- 504 9. Okuda M, Okazaki S, Yamasaki S, Okuda S, Sugiyama M. Host range and  
505 complete genome sequence of Cucurbit chlorotic yellows virus, a new member  
506 of the genus Crinivirus. Phytopathology. 2010; 100:560–566. doi:  
507 10.1094/PHYTO-100-6-0560
- 508 10. Martín G, Velasco L, Segundo E, Cuadrado IM, Janssen D. (2008). The complete  
509 nucleotide sequence and genome organization of bean yellow disorder virus, a  
510 new member of the genus Crinivirus. Arch Virol. 2008; 153:999–1001. doi:  
511 10.1007/s00705-008-0077-y
- 512 11. Ruiz ML, Simon A, Garcia MC, Janssen D. First report of Lettuce chlorosis virus  
513 infecting bean in Spain. Plant Dis. 2014; 98:857
- 514 12. Nagy PD. Recombination in plant RNA viruses, In: Plant Virus Evolution, ed  
515 MJ.Roossinck (Berlin; Heidelberg: Springer); 2008. pp. 133–156.
- 516 13. Sztuba-Solińska J, Urbanowicz A, Figlerowicz M, Bujarski JJ. RNA-RNA  
517 Recombination in Plant Virus Replication and Evolution. Annu Rev Phytopathol.  
518 2011; 49: 415–443. doi: 10.1146/annurev-phyto-072910-095351
- 519 14. Bujarski JJ, Kaesberg P. Genetic recombination in a multipartite plant virus.  
520 Nature. 1986; 321:528–31.

- 521 15. Bousalem M, Douzery EJP, Fargette D. High genetic diversity, distant  
522 phylogenetic relationships and intraspecies recombination events among  
523 natural populations of Yam mosaic virus: a contribution to understanding  
524 potyvirus evolution. *J Gen Virol.* 2000; 81:243–55.
- 525 16. Visser JC, Bellstedt DU. An assessment of molecular variability and  
526 recombination patterns in South African isolates of potato virus Y. *Arch. Virol.*  
527 2009; 154: 1891–900.
- 528 17. Yamasaki S, Sakai J, Fuji S, Kamisoyama S, Emoto K, Ohshima K, et al.  
529 Comparisons among isolates of sweet potato feathery mottle virus using  
530 complete genomic RNA sequences. *Arch. Virol.* 2010; 155:795–800
- 531 18. Rubio L, Ayllo MA, Kong P, Fernandez A, Polek M, Guerri J, et al. Genetic  
532 variation of citrus tristeza virus isolates from California and Spain: evidence for  
533 mixed infections and recombination. *J Virol.* 2001; 75:8054–8062
- 534 19. Rubio L, Guerri J, Moreno P. Genetic variability and evolutionary dynamics of  
535 viruses of the family Closteroviridae. *Front Microbiol.* 2013; 4(June):1–15. doi:  
536 10.3389/fmicb.2013.00151
- 537 20. Boulila M. Selective pressure, putative recombination events and evolutionary  
538 relationships among members of the family Closteroviridae: A proposal for a  
539 new classification. *Biochem Syst Ecol.* 2010; 38(6):1185–1192.  
540 doi:10.1016/j.bse.2010.12.002
- 541 21. Cuellar WJ, Tairo F, Kreuze JF, Valkonen JPT. Analysis of gene content in sweet  
542 potato chlorotic stunt virus RNA1 reveals the presence of the p22 RNA silencing

- 543 suppressor in only a few isolates: Implications for viral evolution and synergism.  
544 J Gen Virol. 2008; 89(2):573–582. doi:10.1099/vir.0.83471-0
- 545 22. Kataya AR, Suliman MNS, Kalantidis K, Livieratos IC. Cucurbit yellow stunting  
546 disorder virus p25 is a suppressor of post-transcriptional gene silencing. Virus  
547 Res. 2009; 145:48–53. doi:10.1016/j.virusres.2009.06.010
- 548 23. Kreuze JF, Savenkov EI, Cuellar W, Li X, Valkonen JPT. Viral class 1 RNase III  
549 involved in suppression of RNA silencing. J Virol. 2005; 79:7227–7238.
- 550 24. Cañizares MC, Navas-Castillo J, Moriones E. Multiple suppressors of RNA  
551 silencing encoded by both genomic RNAs of the crinivirus, Tomato chlorosis  
552 virus. Virology 2008; 379:168–174. doi:10.1016/j.virol.2008.06.020.
- 553 25. Chen AYS, Pavitrin A, Ng JCK. Agroinoculation of the cloned infectious cDNAs of  
554 Lettuce chlorosis virus results in systemic plant infection and production of  
555 whitefly transmissible virions. Virus Res. 2012; 169(1):310–315.  
556 doi:10.1016/j.virusres.2012.08.010.
- 557 26. Seguin J, Otten P, Baerlocher L, Farinelli L, Pooggin MM. MISIS- 2: a  
558 bioinformatics tool for in-depth analysis of small RNAs and representation of  
559 consensus master genome in viral quasispecies. J Virol Methods. 2016; 233:37–  
560 40.
- 561 27. Valverde RA, Nameth ST, Jordan RL. Analysis of double stranded RNA for plant  
562 virus diagnosis. Plant Dis. 1990; 74:255-258.
- 563 28. Kumar S, Stecher G, Tamura K. MEGA7: Molecular Evolutionary Genetics  
564 Analysis version 7.0 for bigger datasets. Mol Biol Evol. 2016; 33:1870-1874.

- 565 29. Darriba D, Taboada GL, Doallo R, Posada D. jModelTest 2: more models, new  
566 heuristics and parallel computing. *Nat Methods*. 2012; 9:772.
- 567 30. Martin DP, Murrell B, Golden M, Khoosal A, Muhire B, 2015. RDP4: detection  
568 and analysis of recombination patterns in virus genomes. *Virus Evol.*  
569 2015;26(1): vev003.
- 570 31. Lole KS, Bollinger RC, Paranjape RS, Gadkari D, Kulkarni SS, Novak NG, et al. Full-  
571 length Human immunodeficiency virus type 1 genomes from subtype C-  
572 infected sero converters in India, with evidence of inter subtype recombination.  
573 *J Virol*. 1999; 73:152-160.
- 574 32. Pamilo P, Bianchi NO. Evolution of the Zfx and Zfy genes: rates and  
575 interdependence between the genes. *Mol Biol Evol*. 1993; 10:271–281.
- 576 33. Li WH. Unbiased estimation of the rates of synonymous and non synonymous  
577 substitutions. *J Mol Evol*. 1993; 36:96–99.
- 578 34. Yang ZH, Bielawski JP. Statistical methods for detecting molecular adaptation.  
579 *Trends Ecol. Evol*. 2000; 15:496–503.
- 580 35. Marco CF, Aranda MA. Genetic diversity of a natural population of Cucurbit  
581 yellow stunting disorder virus. *J Gen Virol*. 2005; 86:815–822.
- 582 36. García-Arenal F, Fraile A, Malpica JM, Variability and genetic structure of plant  
583 virus populations. *Annu. Rev. Phytopathol*. 2001; 39:157–186
- 584 37. Wisler GC, Duffus JE, Liu HY, Li RH. Ecology and epidemiology of whitefly-  
585 transmitted closteroviruses. *Plant Dis*. 1998; 82:270–280
- 586 38. Wisler GC, Duffus JE. Transmission properties of whitefly-borne criniviruses and  
587 their impact on virus epidemiology. In: *Virus–Insect–Plant Interactions*, editors.

- 588 K.F. Harris, O.P. Smith & J.E. Duffus. Academic Press, San Diego, USA; 2001 pp.  
589 293–308.
- 590 39. Segundo E, Martín G, Cuadrado IM, Janssen D. A new yellowing disease in  
591 *Phaseolus vulgaris* associated with a whitefly-transmitted virus. *Plant Pathol.*  
592 2004; 53:517–517
- 593 40. Tzanetakis IE, Martin RR. Complete nucleotide sequence of a strawberry isolate  
594 of Beet pseudoyellows virus. *Virus Genes*. 2004; 28:239–246
- 595 41. Zhao X, Zhu M, Wu Q, Zhang J, Xu, Y, Tao X. Complete genome sequence of a  
596 lettuce chlorosis virus isolate from China and genome  
597 recombination/rearrangement analysis. *Archiv Virol*. 2017; 163(3):751-754.  
598 doi:10.1007/s00705-017-3604-x
- 599 42. Zhang SB, Zhang DY, Liu Y, Luo XW, Liu MY, Du J,. First report of Lettuce  
600 chlorosis virus infecting tomato in China. *Plant Dis*. 2017; 101(5):846.
- 601 43. Tian X; Tian Y; Yu YQ; Wang XF; Li ZA, Li RH; et al. A New Natural Host of Lettuce  
602 chlorosis virus in China *Plant Dis*. 2018; 102(2)
- 603 44. Mongkolsiriwattana C, Zhou JS, Ng JCK. A 3'-end structure in RNA2 of a  
604 crinivirus is essential for viral RNA synthesis and contributes to replication-  
605 associated translation activity. *Sci. Rep*. 2016; 6:34482. doi: 10.1038/srep34482
- 606 45. Bujarski JJ. Genetic recombination in plant-infecting messenger-sense RNA  
607 viruses: overview and research perspectives. *Front Plant Sci*. 2013; 4(68):1-9.
- 608 46. Wintermantel WM, Wisler GC, Anchieta AG, Liu HY, Karasev AV, Tzanetakis IE.  
609 The complete nucleotide sequence and genome organization of Tomato  
610 chlorosis virus. *Arch. Virol*. 2005; 150:2287–2298.

- 611 47. Kreuze JF, Savenkov EI, Valkonen JP. Complete genome sequence and analyses  
612 of the subgenomic RNAs of Sweet potato chlorotic stunt virus reveal several  
613 new features for the genus Crinivirus. *J. Virol.* 2002; 76:9260–9270.
- 614 48. Liveratos IC, Eliasco E, Muller G, Olsthoorn RCL, Salazar LF, Pleij CWA, et al.  
615 Analysis of the RNA of Potato yellow vein virus: evidence for a tripartite  
616 genome and conserved 3'-terminal structures among members of the genus  
617 Crinivirus. *J Gen. Virol.* 2004; 85:2065–2075.
- 618 49. Agranovsky AA, Koonin EV, Boyko VP, Maiss E, Frotsch LR, Lunina NA.. Beet  
619 yellow closterovirus: complete genome structure and identification of a leader  
620 papain-like thiolprotease. *Virology.* 1994; 198:311–324.
- 621 50. Dolja VV, Karasev AV, Koonin EV. Molecular biology and evolution of  
622 closteroviruses: sophisticated build-up of large RNA genomes. *Annu Re*  
623 *.Phytopatho.* 1994; 32: 261–285.
- 624 51. Klaassen VA, Boeshore, M. L, Koonin EV, Tian T, Falk BW. Genome structure and  
625 phylogenetic analysis of lettuce infectious yellows virus, a whitefly-transmitted,  
626 bipartite closterovirus. *Virology.* 1995; 208: 99–110.
- 627 52. Cretazzo E, Velasco L. High-throughput sequencing allowed the completion of  
628 the genome of grapevine Red Globe virus and revealed recurring co-infection  
629 with other tymoviruses in grapevine. *Plant Pathol.* 2017; 66(7):1202-1213
- 630 53. Herranz CC, Navarro AA, Sommen E, Pallas V. Comparative analysis among the  
631 small RNA populations of source, sink and conductive tissues in two different  
632 plant-virus pathosystems. *BMC Genomics.* 2015;16: 1–15. doi:10.1186/s12864-  
633 015-1327-5.

- 634 54. Donaire L, Wang Y, González-Ibeas D, Mayer KF, Aranda MA, Llave C, Deep-  
635 sequencing of plant viral small RNAs reveals effective and widespread targeting  
636 of viral genomes. *Virology* 2009; 392: 203-214
- 637 55. Nouri S, Arevalo R, Falk BW, Groves RL. Genetic Structure and Molecular  
638 Variability of Cucumber Mosaic Virus Isolates in the United States. *PLoS One*.  
639 2014; 9: e96582.

640

## 641 **Supporting information**

642 **S1 Table. Primers list used to confirm the LCV-SP genome by RT-PCR.**

643 **S2 Table. Numbers of reads homologies identified by BLASTN from contigs obtained**  
644 **from small RNAs and dsRNAs libraries.**

645 **S1 Fig. Percentages of nucleotide species at the 5' and 3' ends of redundant vsRNAs**  
646 **derived from LCV-SP RNA1 (A) and RNA2 (B) according to the size of the reads.**

647

## RNA 1 (8.85 kb)

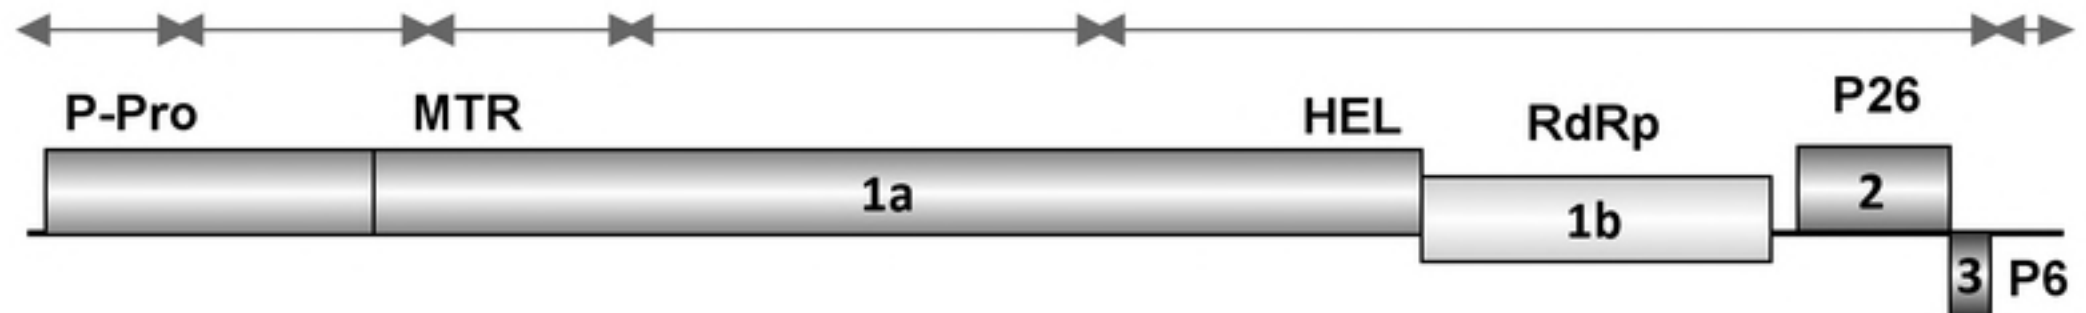

## RNA 2 (8.67 kb)

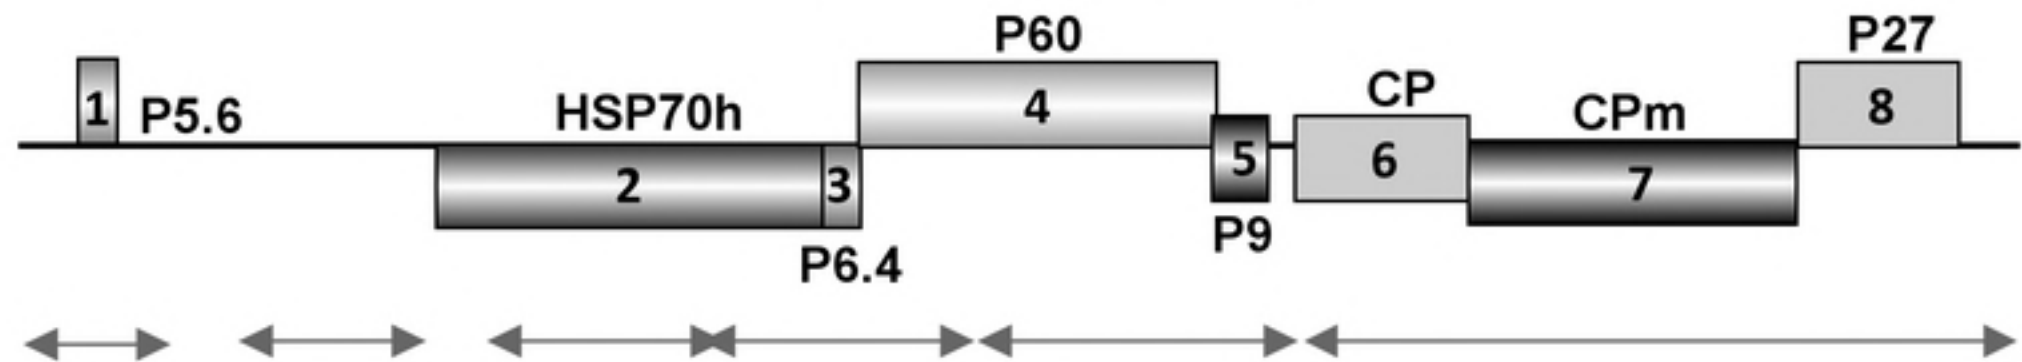



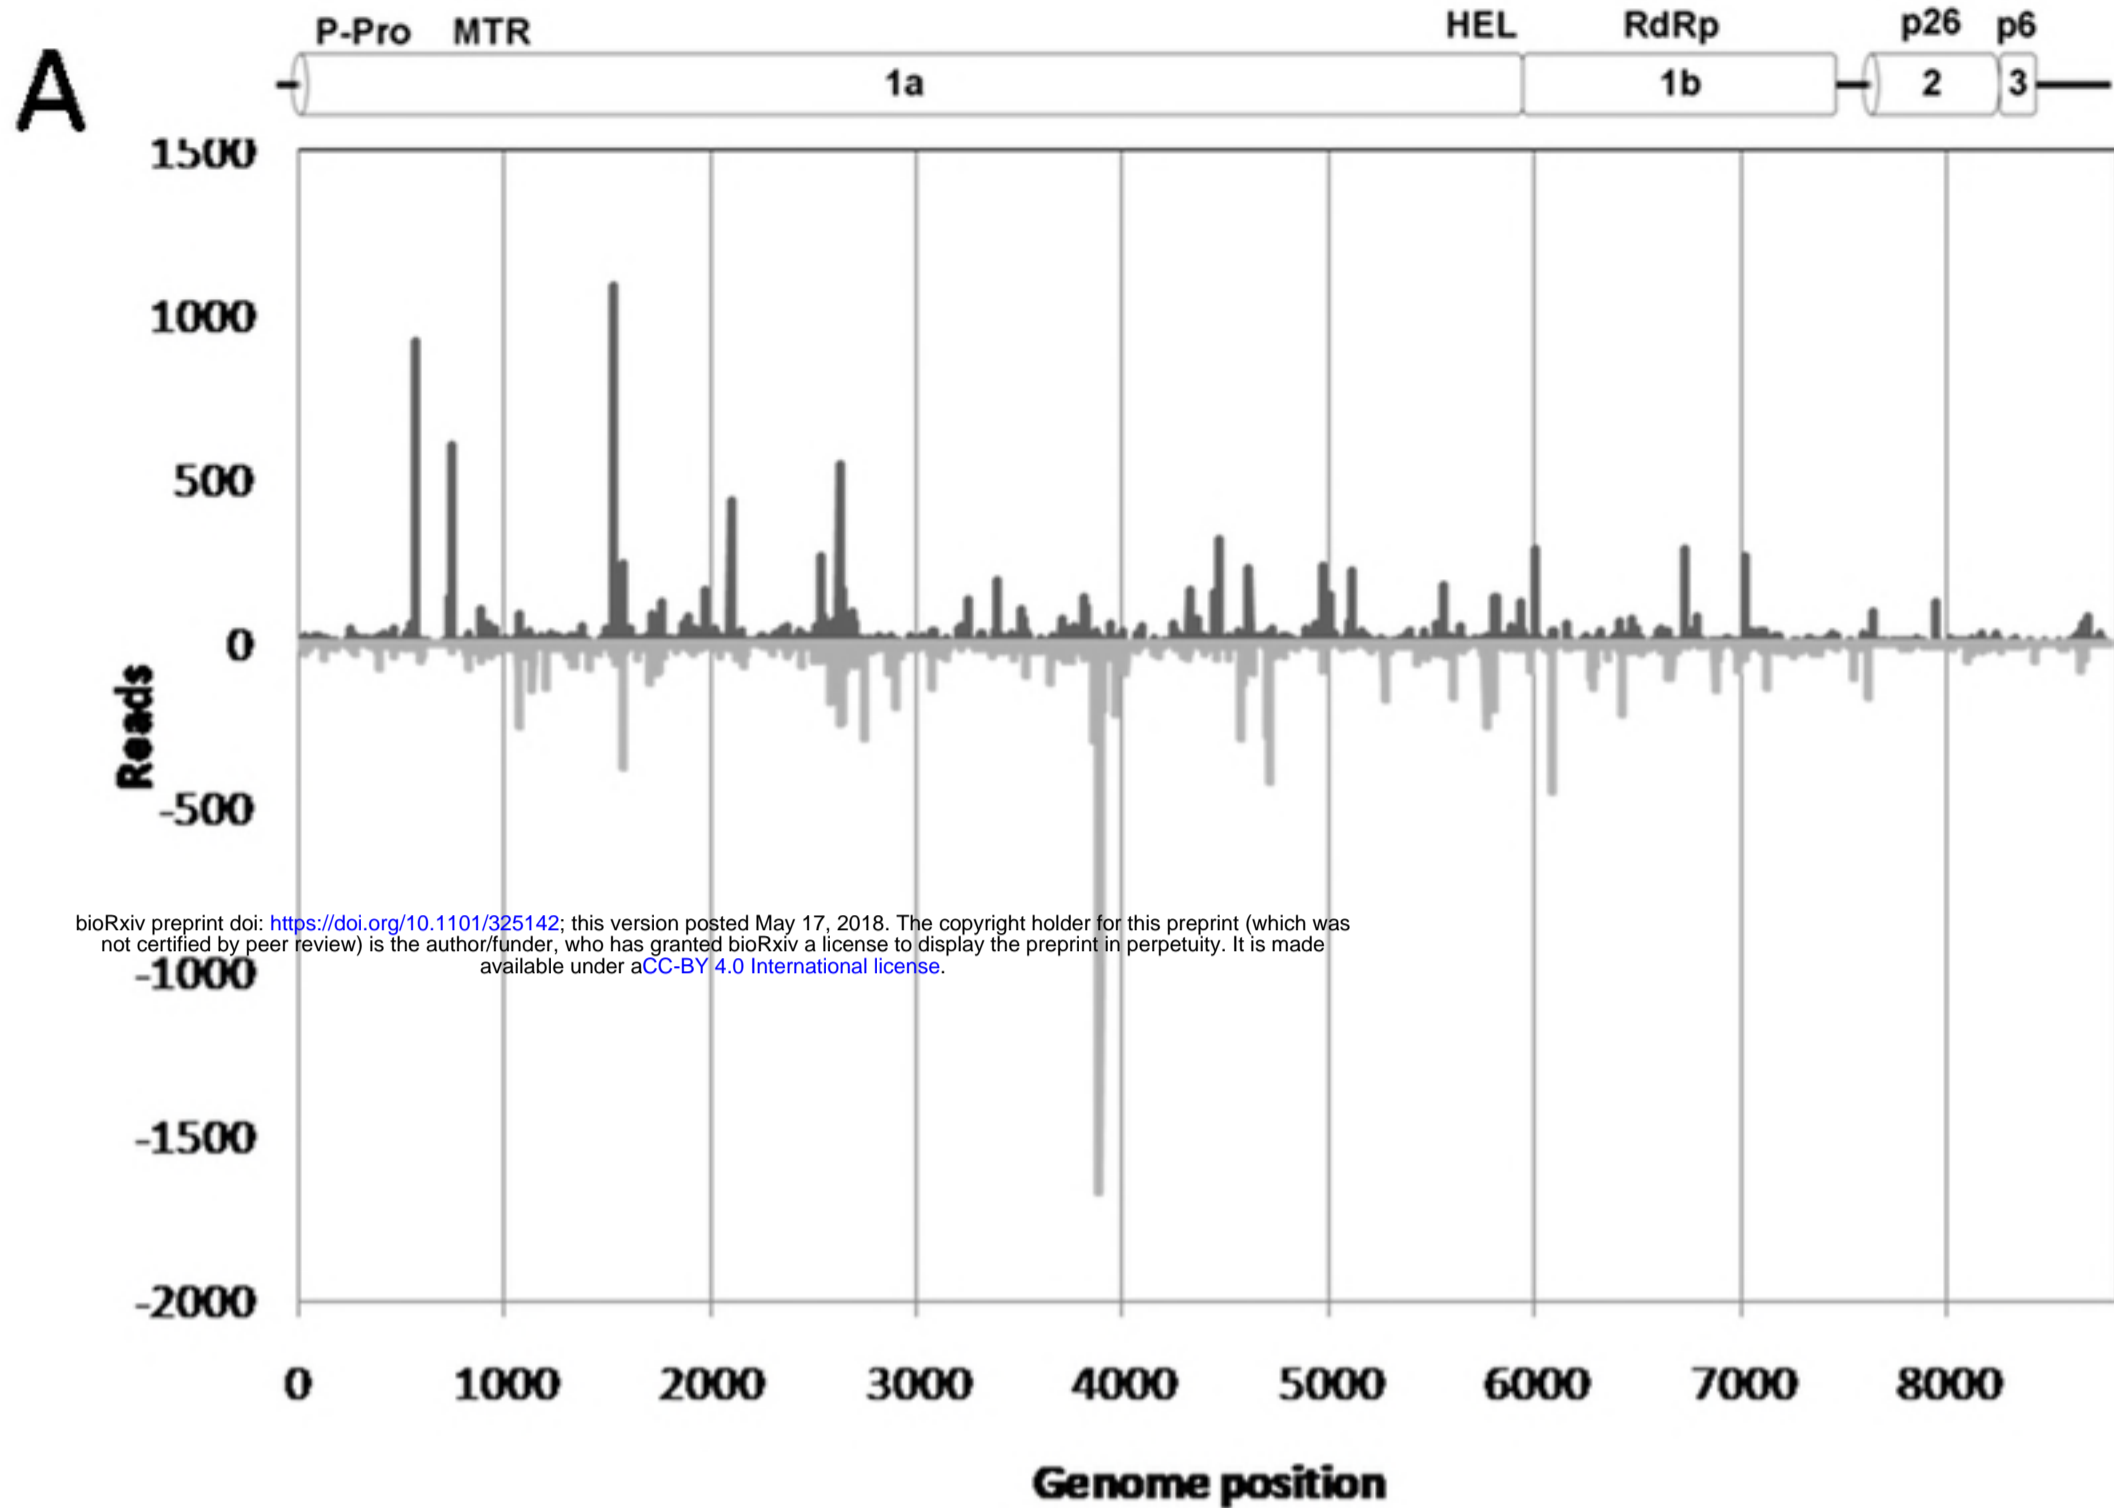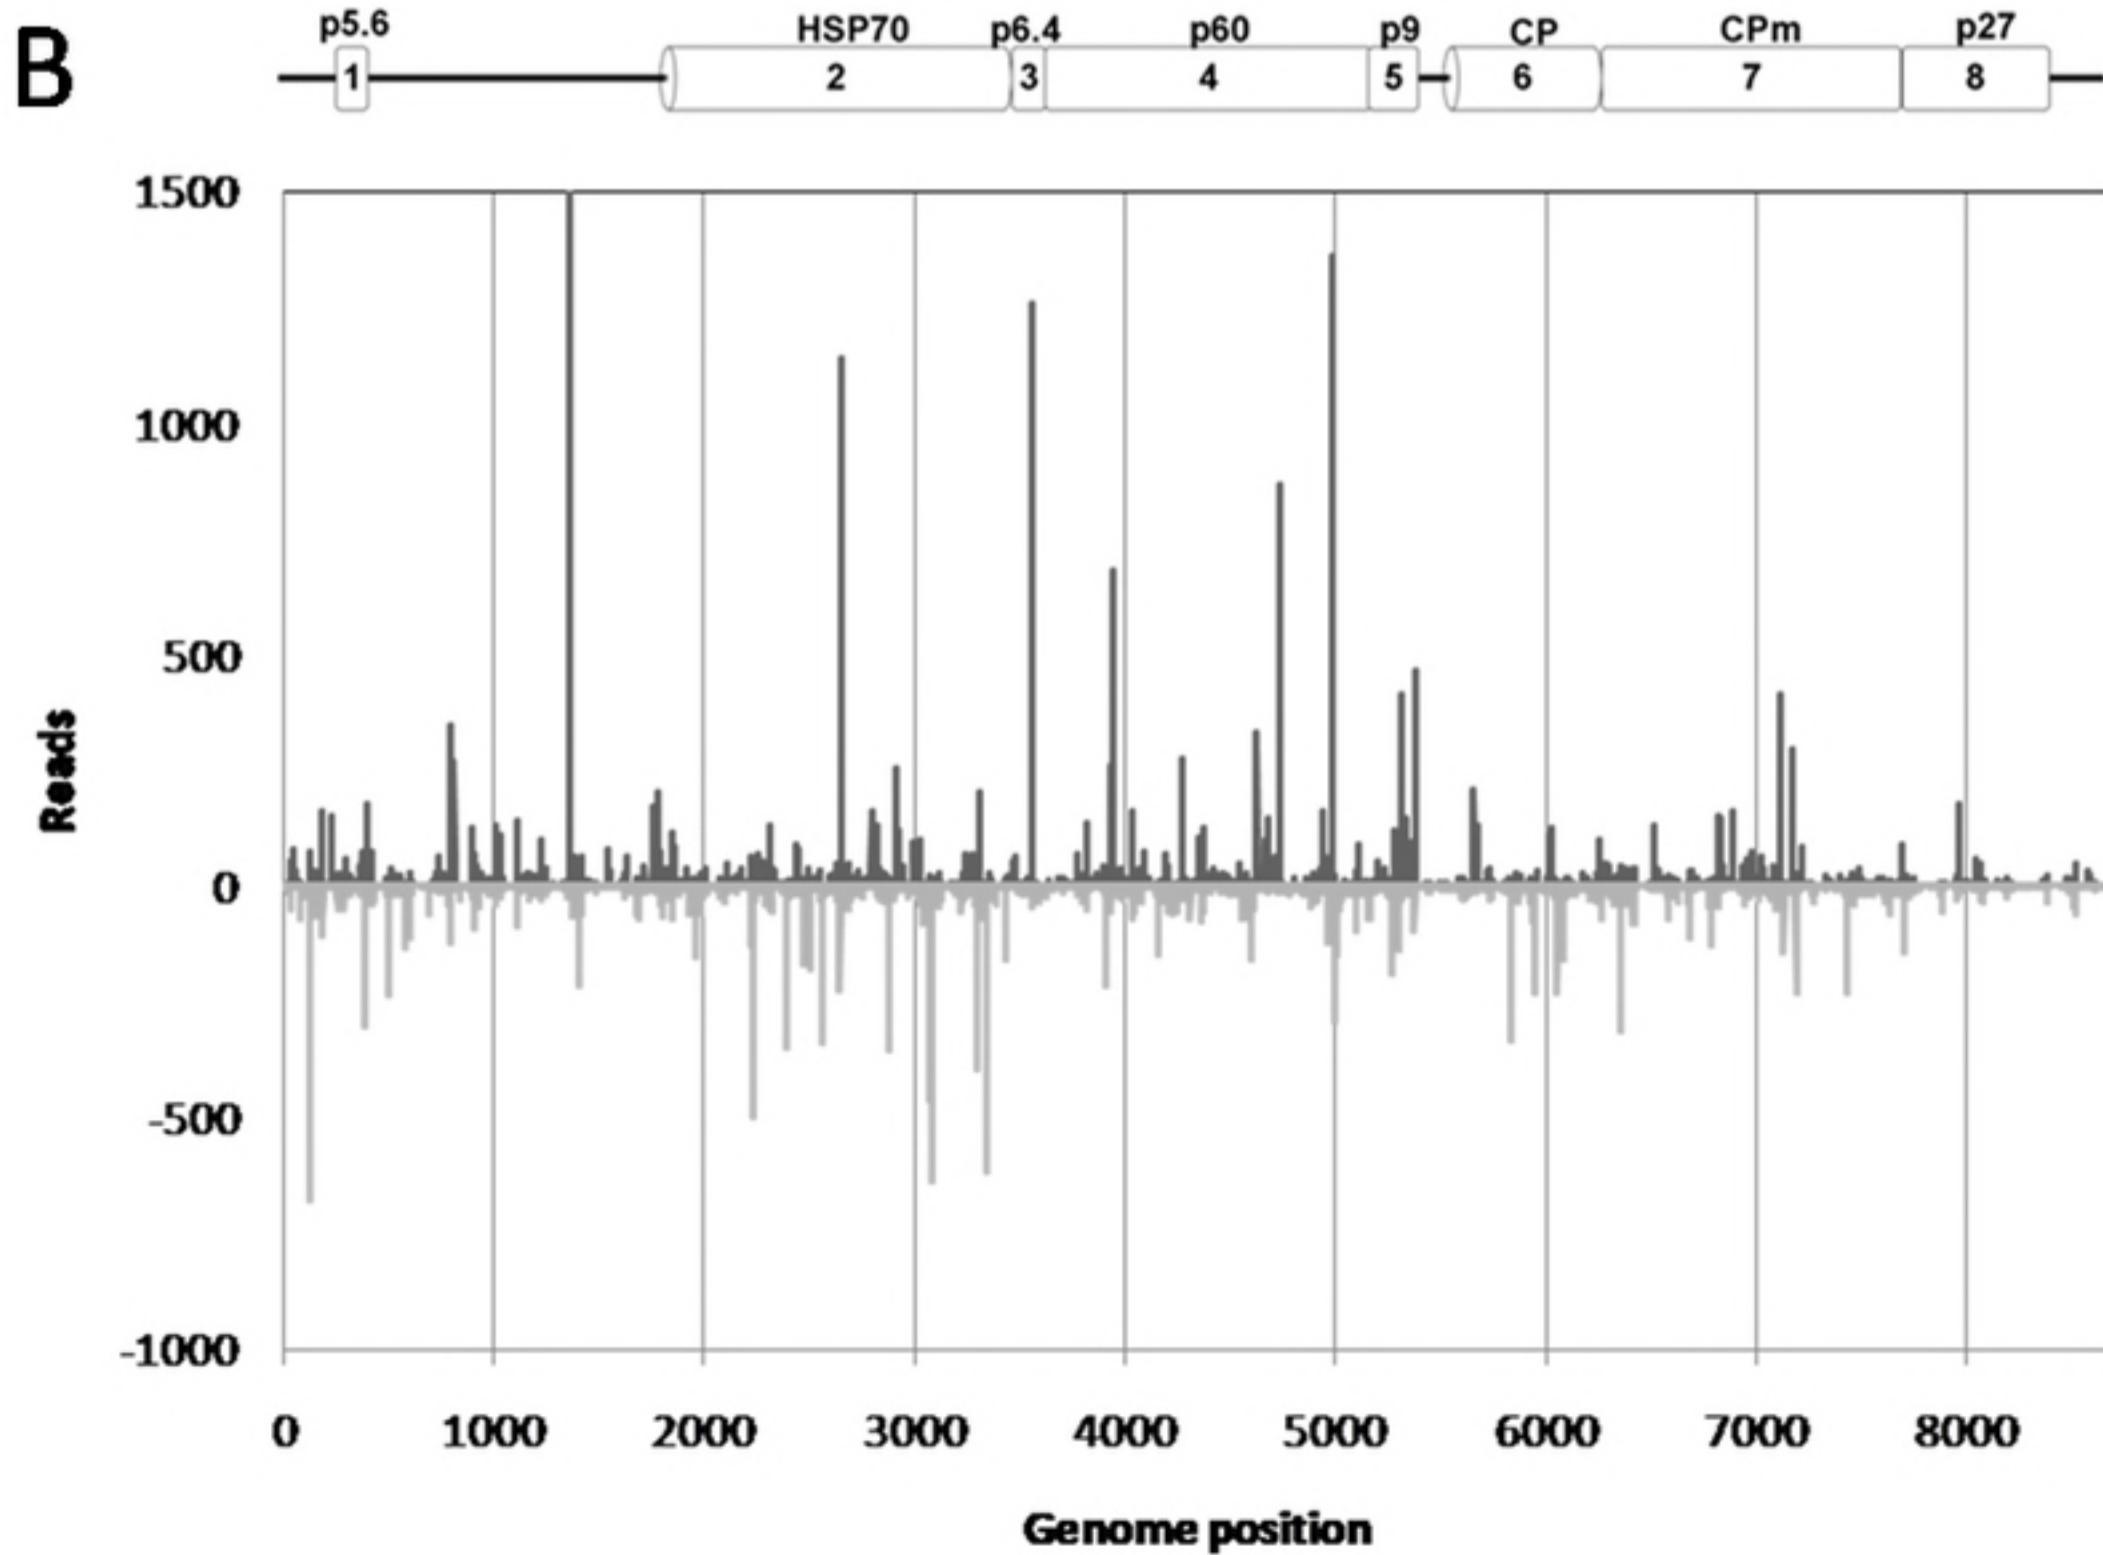

# RNA1

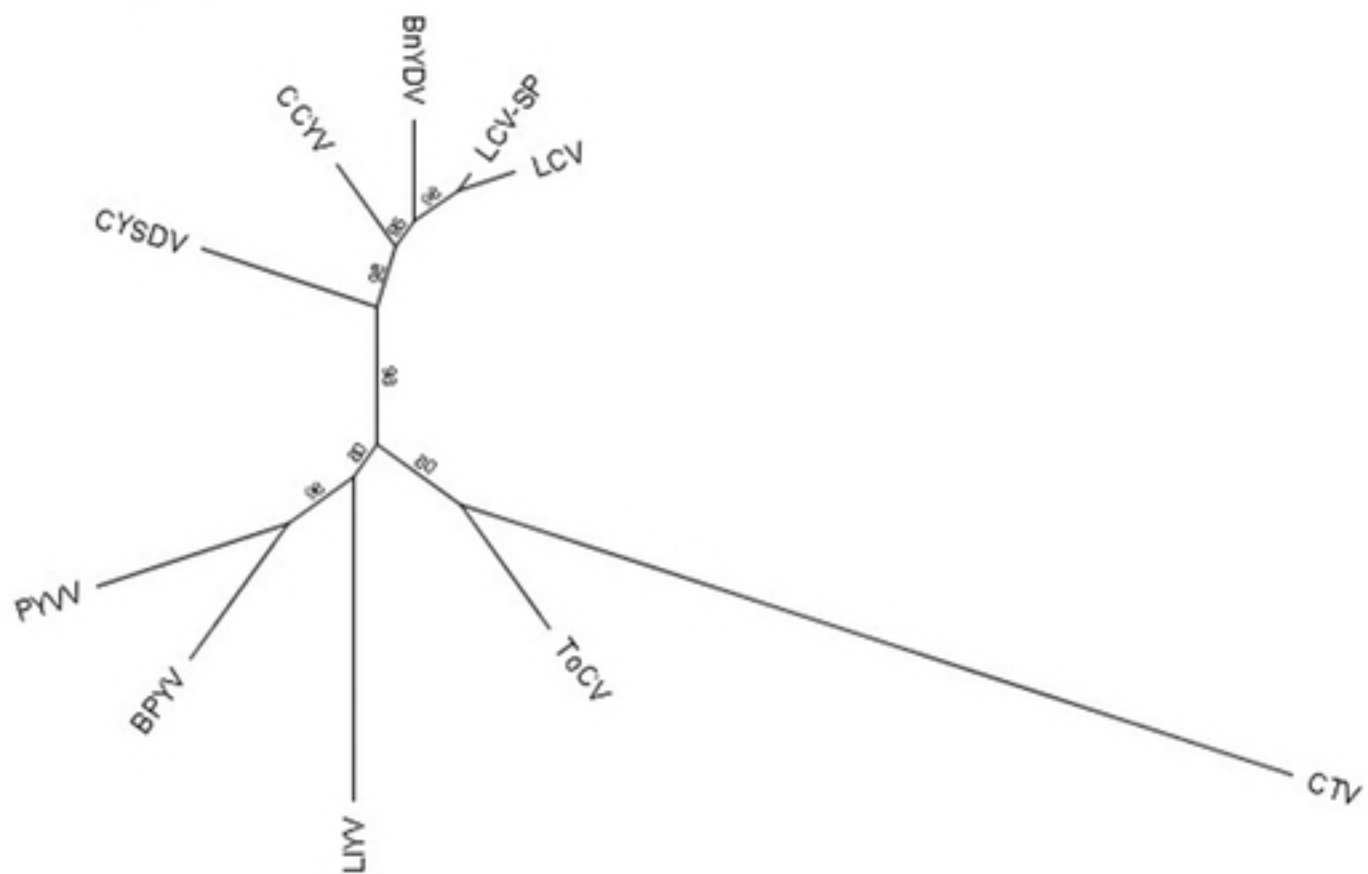

0.8

# RNA2

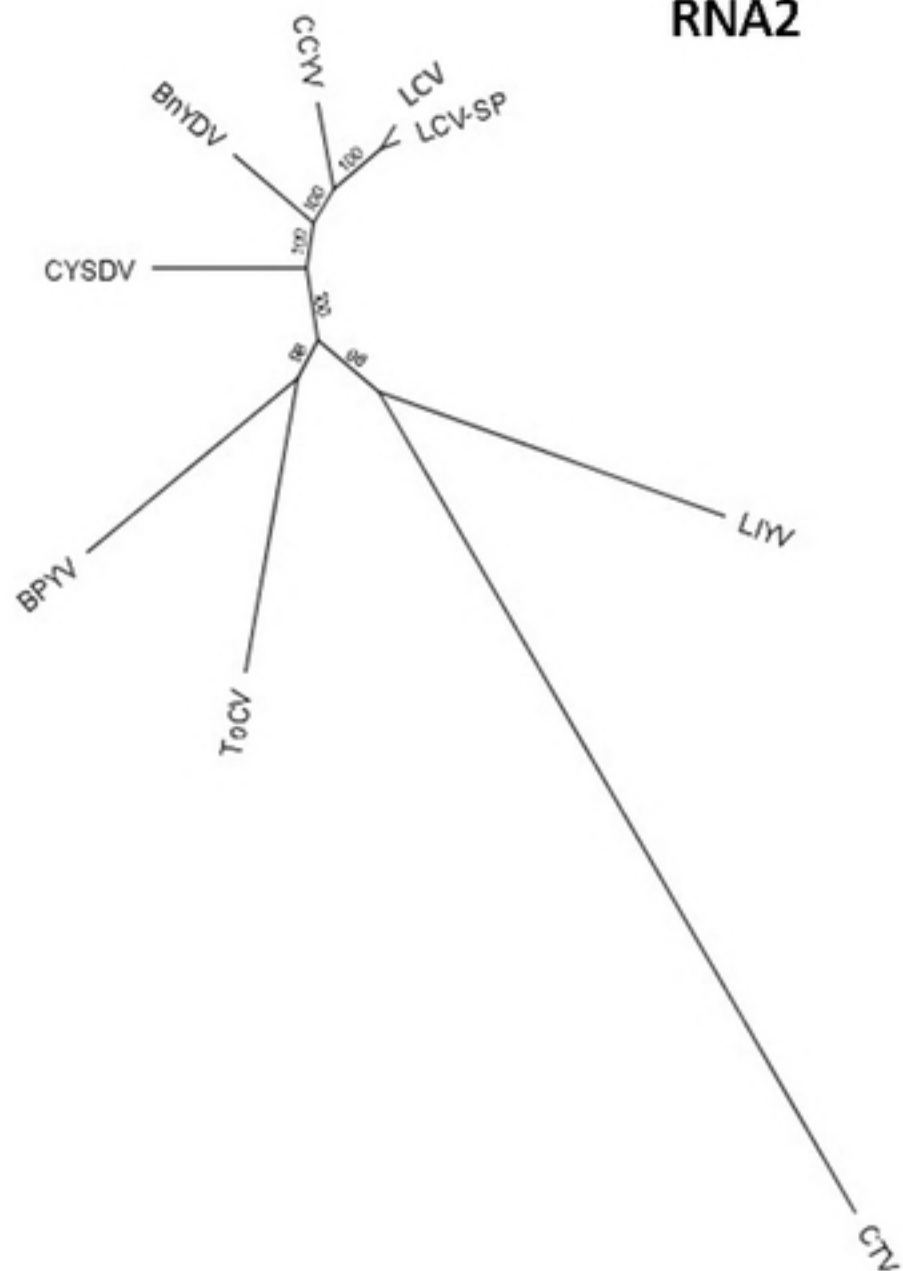

0.8

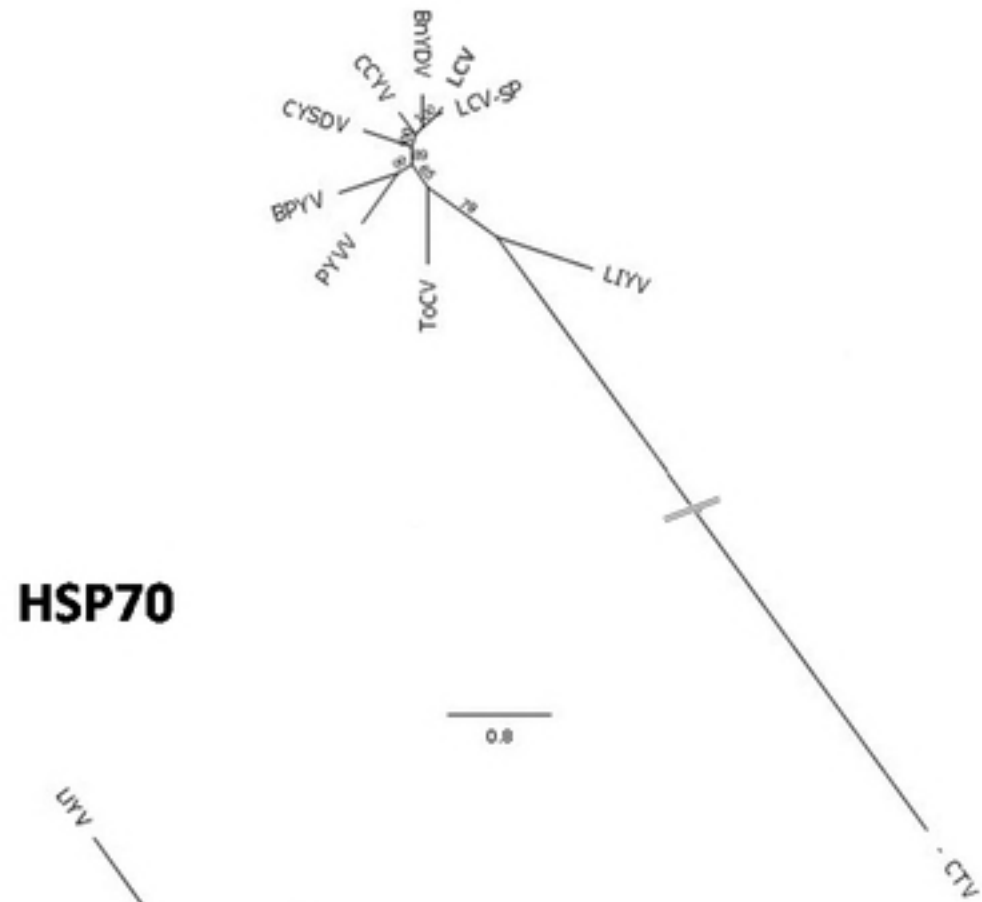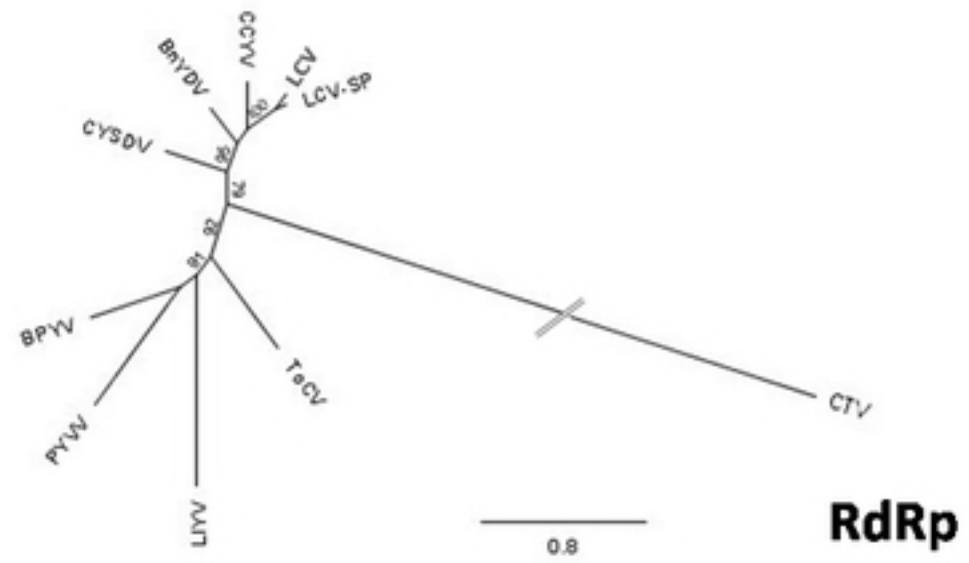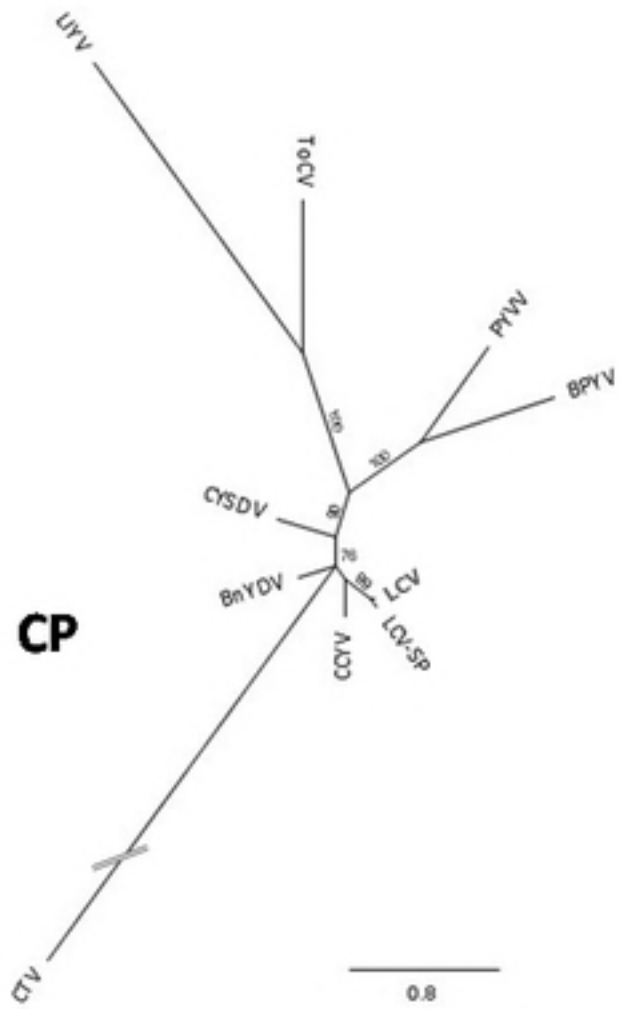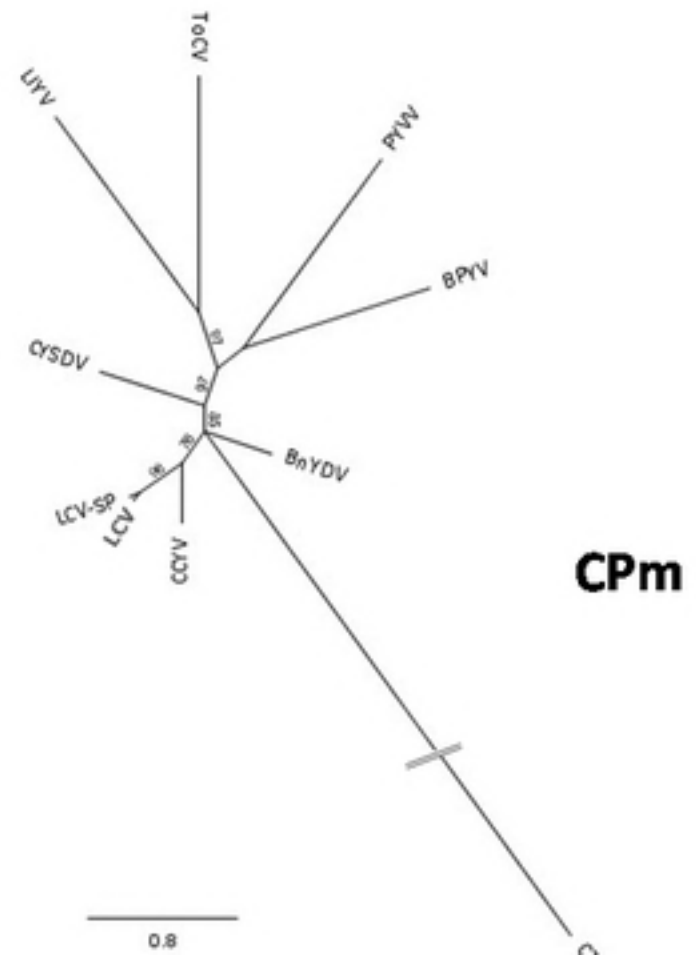

**CCYV RNA1**

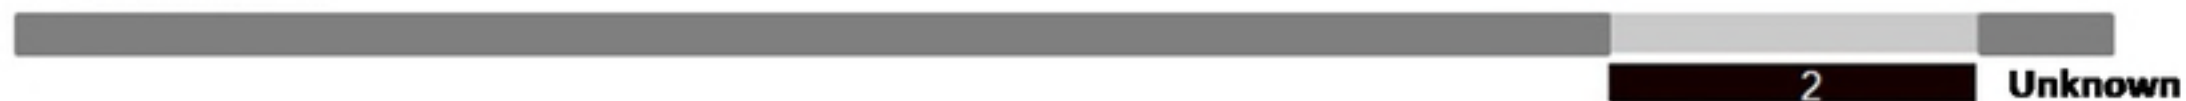

**LCV-SP RNA1**

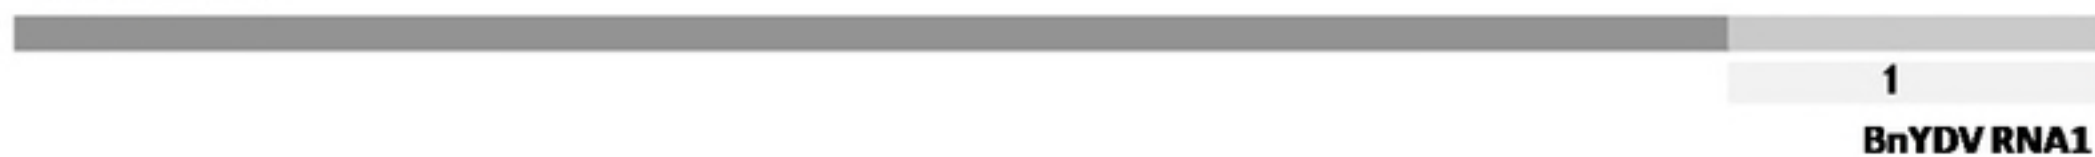

**CCYV RNA2**

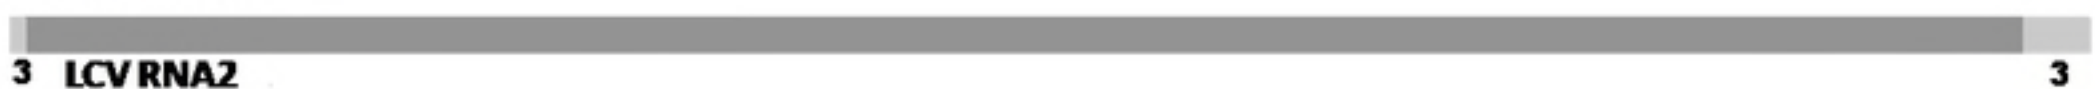

**LCV RNA2**

**LCV RNA2**

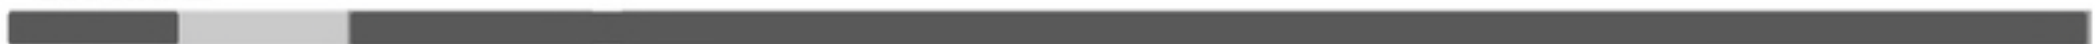

**4**

**CCYV RNA2**

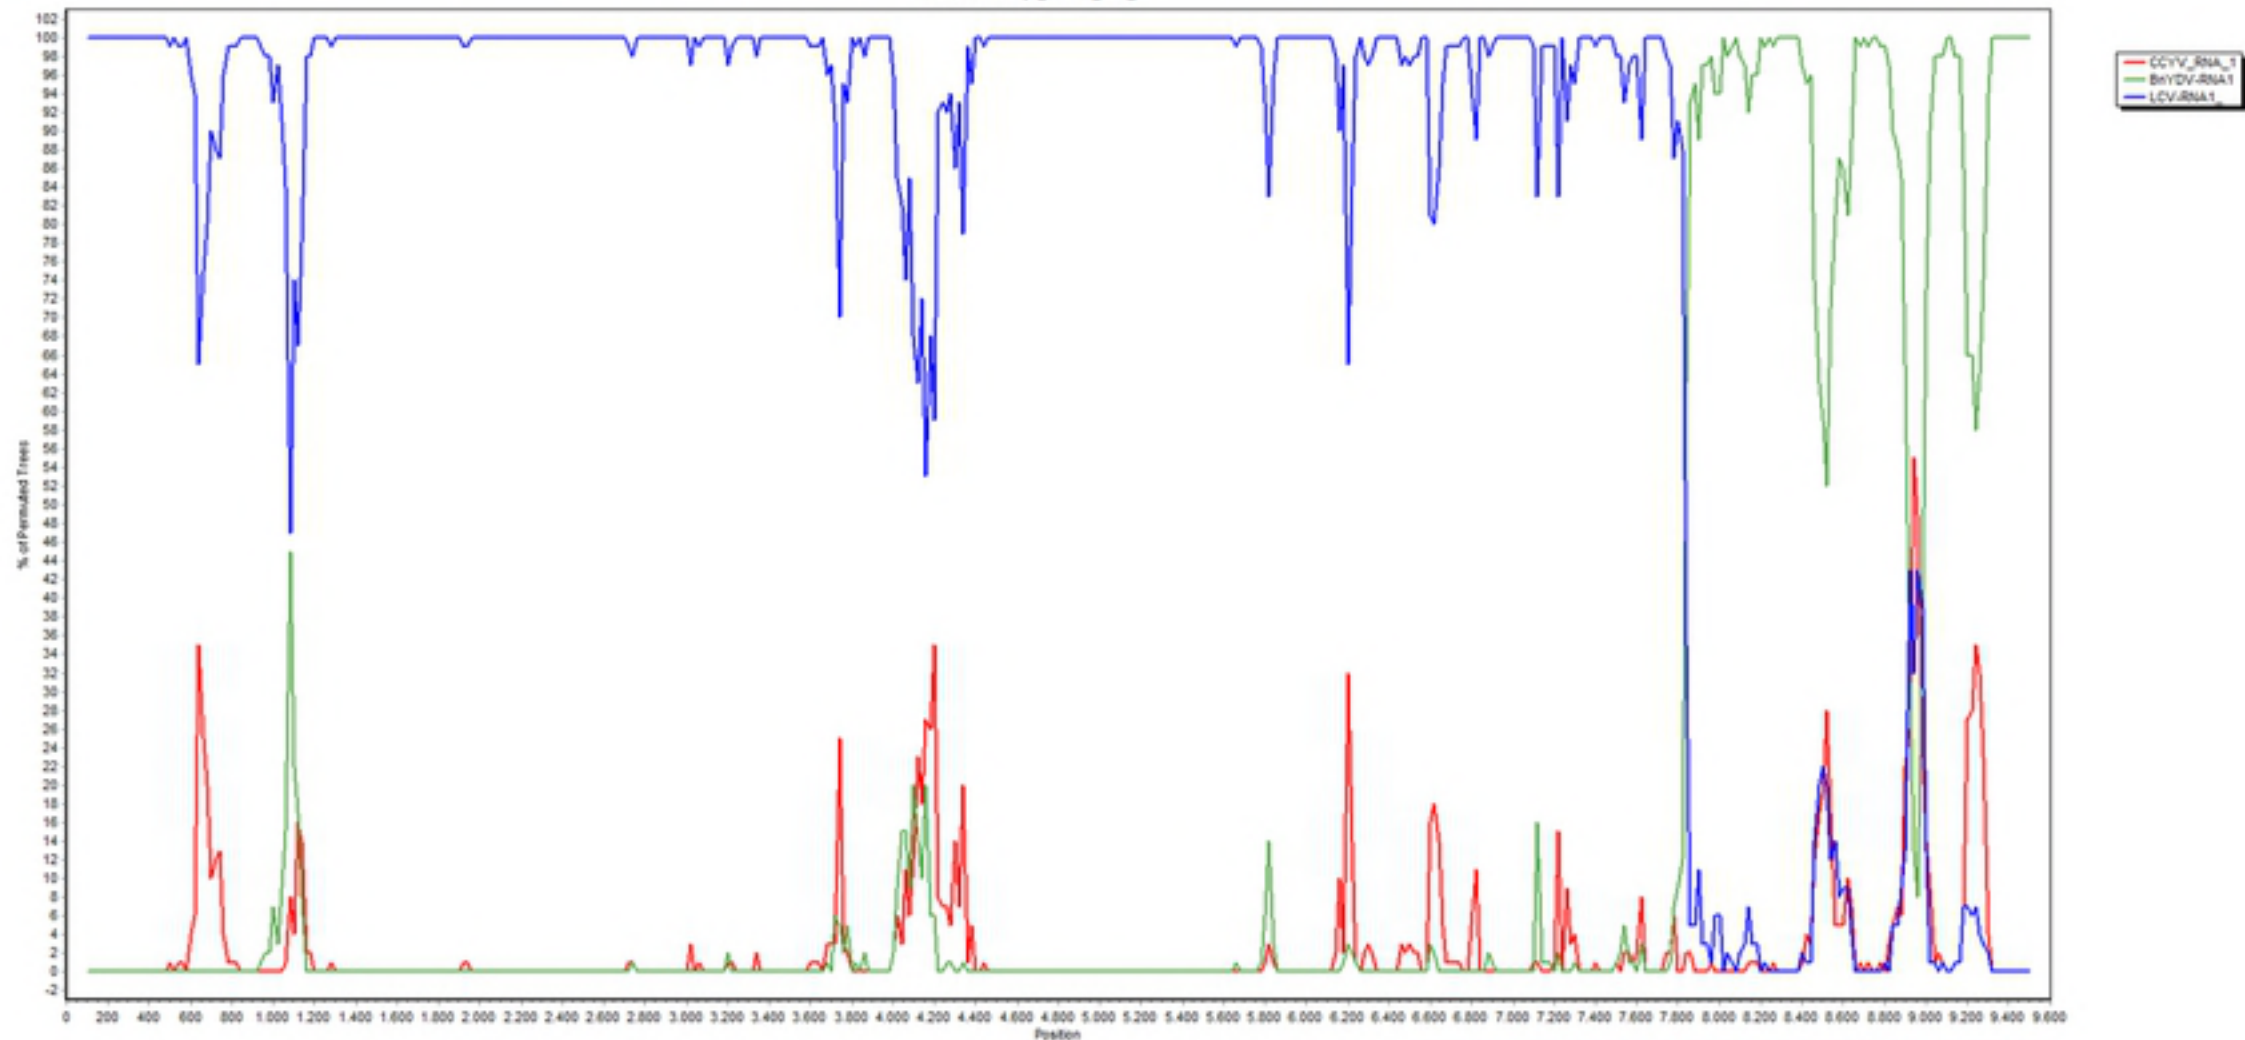

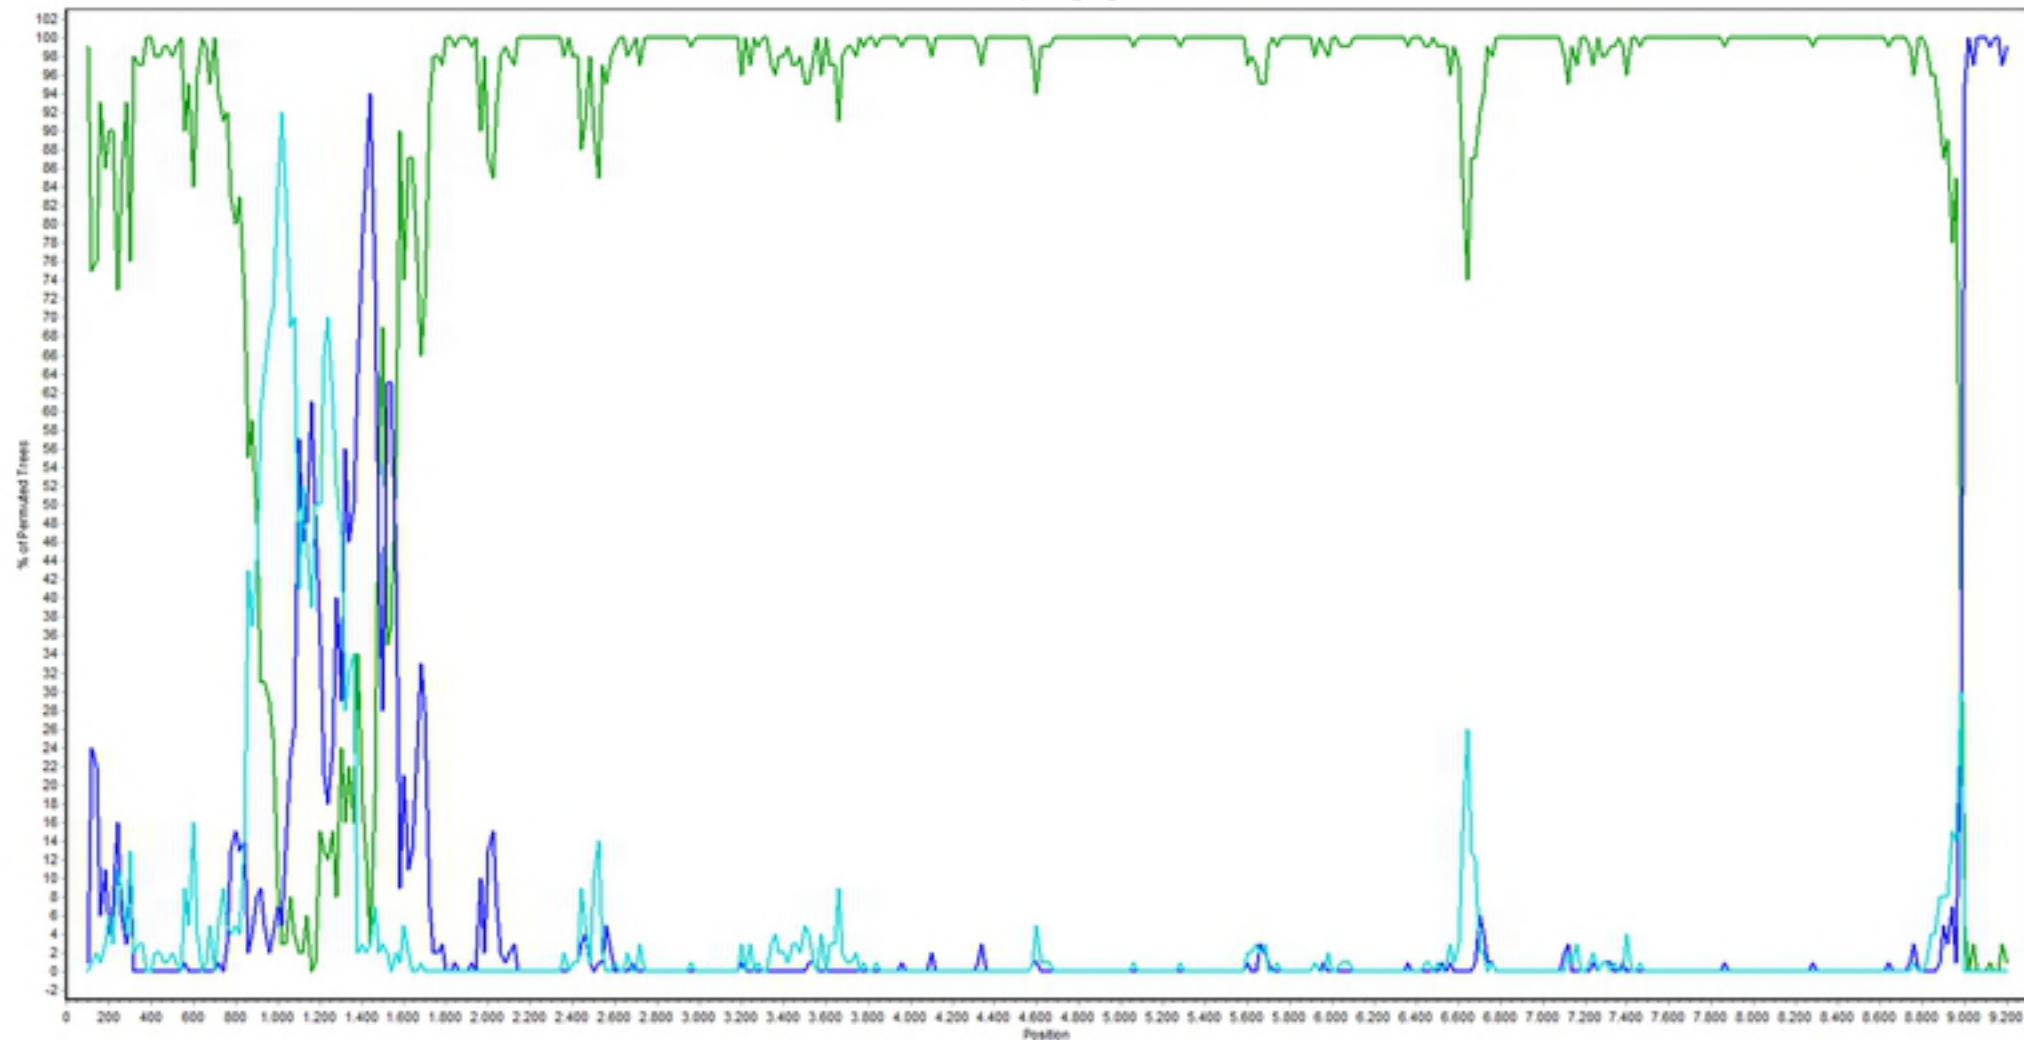

— BNYDV\_RNA\_2  
— LCV-RNA2  
— LCV.SP\_RNA\_2

1000

1

2

3

4

5

6

7

8

500

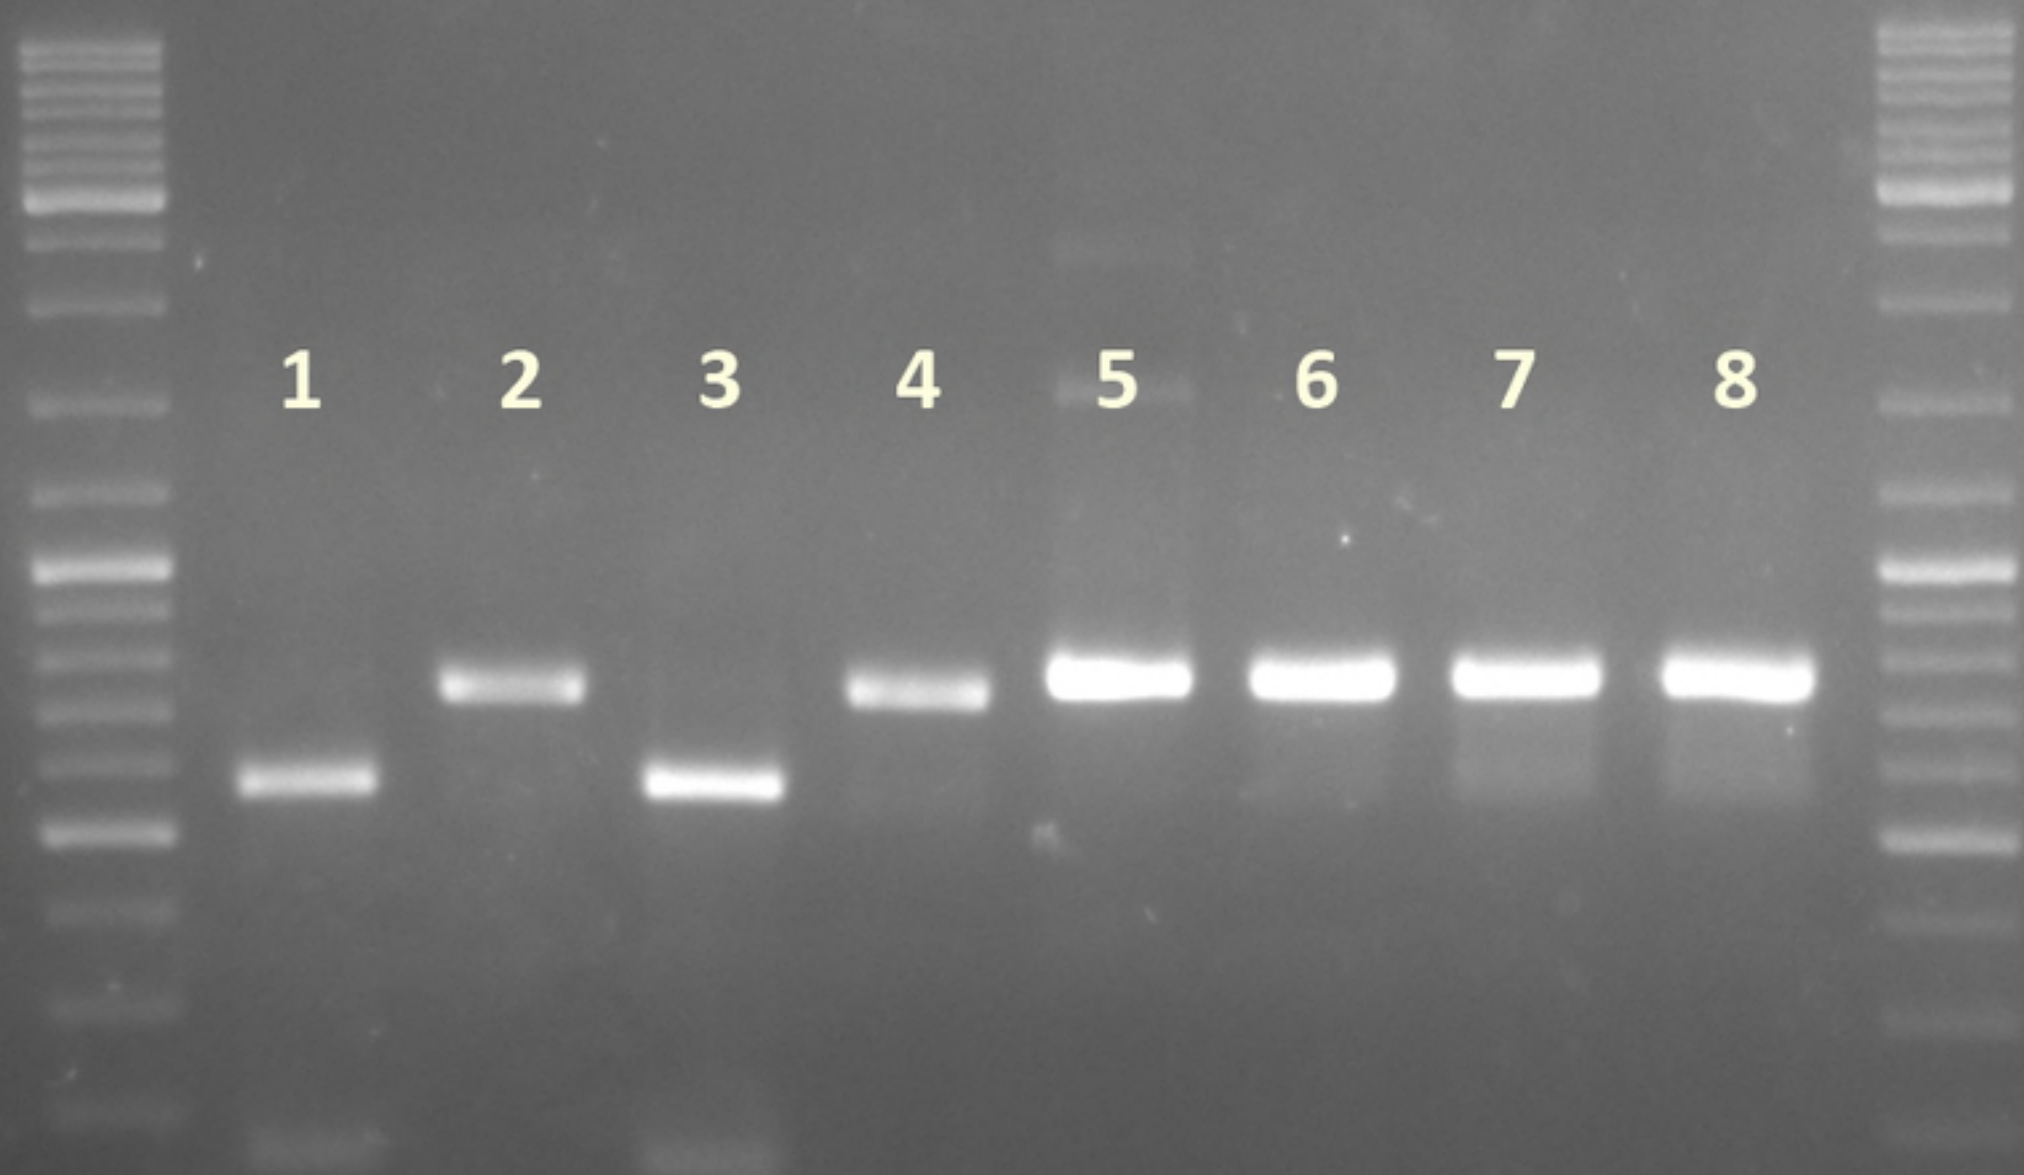

Source: http://biorxiv.org/content/10.1101/325142v1.full.pdf
